1  
2  
3  
4  
5  
6  
7

**Full title:**

Drug reformulation for a neglected disease.

The NANOHAT project to develop a safer more effective sleeping sickness drug.

8  
9  
10  
11

**Short title:**

Pentamidine reformulation to improve safety and efficacy against Human African Trypanosomiasis

12 **AUTHORS:** *Lisa Sanderson<sup>1†</sup>, Marcelo da Silva<sup>1†</sup>, Gayathri N. Sekhar<sup>1</sup>, Rachel C. Brown<sup>1</sup>, Hollie Burrell-*  
13 *Saward<sup>2</sup>, Mehmet Fidanboyu<sup>1</sup>, Bo Liu<sup>3</sup>, Lea Ann Dailey<sup>1</sup>, Cécile A. Dreiss<sup>1</sup>, Chris Lorenz<sup>4</sup>, Mark Christie<sup>1</sup>,*  
14 *Shanta J. Persaud<sup>3</sup>, Vanessa Yardley<sup>2</sup>, Simon L Croft<sup>2</sup>, Margarita Valero<sup>5</sup> and Sarah A. Thomas<sup>1\*</sup>*

15 <sup>1</sup>King's College London, Institute of Pharmaceutical Science, Stamford Street, London, UK

16 <sup>2</sup>Faculty of Infectious and Tropical Diseases, London School of Hygiene and Tropical Medicine, London,  
17 UK.

18 <sup>3</sup>King's College London, Department of Diabetes, School of Life Course Sciences, Faculty of Life  
19 Sciences & Medicine, 2.9N Hodgkin Building, Guy's campus, London UK.

20  
21 <sup>4</sup>King's College London, Theory & Simulation of Condensed Matter Group, Department of Physics,  
22 Strand, London WC2R 2LS, UK

23  
24 <sup>5</sup>Physical Chemistry Department, Faculty of Pharmacy, University of Salamanca, Spain.

25  
26  
27 †Joint first authors

28  
29 \*Corresponding author: sarah.thomas@kcl.ac.uk

30  
31  
32

33 **Author Contributions for uploading during submission**

34 **LS: PDRA** *in vivo* BBB (PK and *In situ* brain perfusion technique) and *in vitro* BBB studies. Data analysis.  
35 Result writing.

36 **MAS:** PDRA insulin secretion and cell viability studies, physical chemistry, data analysis result writing.

37 **GNS:** PhD Student *in vitro* BBB studies, haemolysis assay, membrane integrity assay. Data analysis

38 **RCB:** *in vitro* BBB studies.

39 **HBS:** PhD Student *in vitro* anti-trypanosomal assays.

40 **MF:** PhD Student contributed to the initial concept and data sets with P85.

41 **BL:** Trained MF, MAS and LS in insulin secretion assay and helped obtain preliminary data

42 **LAD:** Haemolysis assay and with SAT obtained funding from BBSRC Centre of Integrative Bioscience for  
43 the use of this assay in this study.

44 **SAT:** Introduction, method, result and discussion writing, paper collation, co-ordination. CNS drug  
45 delivery expert. Obtained MRC DPFS funding, concept, project management and experimental design,  
46 data analysis and interpretation.

47 **CD, CL, MV, SP, MC, SC, SAT:** obtaining MRC DPFS funding, concept, project management and  
48 experimental design, data analysis and interpretation.

49

## 50 **Abstract**

51 Human African trypanosomiasis (HAT or sleeping sickness) is caused by the parasite *Trypanosoma*  
52 *brucei* spp. The disease has two stages, a haemolymphatic stage after the bite of an infected tsetse  
53 fly, followed by a central nervous system stage where the parasite penetrates the brain, causing death  
54 if untreated. Treatment is stage-specific, due to the blood-brain barrier, with less toxic drugs such as  
55 pentamidine used to treat stage 1. The objective of our research programme was to develop an  
56 intravenous formulation of pentamidine which increases CNS exposure by some 10-100 fold, leading  
57 to efficacy against a model of stage 2 HAT. This target candidate profile is in line with drugs for  
58 neglected diseases initiative recommendations. To do this, we evaluated the physicochemical and  
59 structural characteristics of formulations of pentamidine with Pluronic micelles (triblock-copolymers  
60 of polyethylene-oxide and polypropylene oxide), selected candidates for efficacy and toxicity  
61 evaluation *in vitro*, quantified pentamidine CNS delivery of a sub-set of formulations *in vitro* and *in*  
62 *vivo*, and progressed one pentamidine-Pluronic formulation for further evaluation using an *in vivo*  
63 single dose brain penetration study. Screening pentamidine against 40 CNS targets did not reveal any  
64 major neurotoxicity concerns, however, pentamidine had a high affinity for the imidazoline<sub>2</sub> receptor.  
65 The reduction in insulin secretion in MIN6  $\beta$ -cells by pentamidine maybe secondary to pentamidine-  
66 mediated activation of  $\beta$ -cell imidazoline receptors and impairment of cell viability. Pluronic F68  
67 (0.01%w/v)-pentamidine formulation had a similar inhibitory effect on insulin secretion as  
68 pentamidine alone and an additive trypanocidal effect *in vitro*. However, all Pluronics tested (P85,  
69 P105 and F68) did not significantly enhance brain exposure of pentamidine. These results are relevant  
70 to further developing block-copolymers as nanocarriers, improving BBB drug penetration and  
71 understanding the side effects of pentamidine.

72 **Abbreviations:** aqueous (aq), blood-brain barrier (BBB), critical aggregation concentration (CAC),  
73 critical micellar concentration (CMC), circumventricular organs (CVO), Cyanmethaemoglobin (CMH),  
74 developmental pathway funding scheme (DPFS), dissipative particle dynamics (DPD), Drugs for  
75 Neglected Diseases initiative (DNDi), dynamic light-scattering (DLS), human African trypanosomiasis

76 (HAT), hydrophilic-lipophilic balance (HLB), intravenous (iv), inward rectifying (IR), molecular weight  
77 (MW), multi-drug resistance associated protein (MRP), Medical Research Council (MRC), not available  
78 (na), parts per million (ppm), pentamidine isethionate (PTI), P-glycoprotein (Pgp), plasma free  
79 haemoglobin (PFH), poly(ethylene oxide) (PEO), poly(propylene oxide) (PPO), saline (sal), scattering  
80 length density (SLD).  
81

## 82 Introduction

83 Human African trypanosomiasis (HAT or sleeping sickness) is a potentially fatal disease caused by the  
84 parasite *Trypanosoma brucei* spp. Recent epidemiological studies in 30 of the 36 African countries  
85 listed as endemic for the disease indicate that, whilst the number of disease cases has been decreasing  
86 since 1990, there are still ~4,000 new infections/year, and ~15,000 cases worldwide [1][2].  
87 Furthermore, there is a substantial unreported burden of HAT [3].

88 The disease has two stages – a haemolympathic stage after the bite of an infected tsetse fly, followed  
89 by a central nervous system (CNS) stage when the parasite penetrates the brain, causing death if left  
90 untreated. The blood-brain barrier (BBB) makes the CNS stage difficult to treat because it prevents  
91 99% of all known compounds from entering the brain, including most anti-HAT drugs[4][5][6][7].  
92 Those that do enter the brain are toxic compounds, can have serious side effects, are complex to  
93 administer and/or are expensive. Pentamidine is a less toxic blood stage drug, which is known to treat  
94 early-late (transition) stage HAT[8], but cannot treat stage 2 disease as it does not sufficiently  
95 penetrate the BBB[7] and causes peripheral side effects (e.g. hypoglycaemia (incidence 5-40%) and  
96 diabetes mellitus (incidence: occasional but irreversible)[9] which preclude increasing the dose to  
97 overcome this limitation. Research has shown pentamidine has a limited ability to cross the BBB and  
98 reach the brain due to its physicochemical characteristics and its removal by the efflux transporters P-  
99 glycoprotein (Pgp) and multi-drug resistance associated protein (MRP) [7](Fig S1). Furthermore,  
100 transporters are considered essential in the mode of action of pentamidine against trypanosomes.

101  
102 Poloxamers, with commercial trademark Pluronic® (BASF) or Synperonics® (CRODA), are triblock  
103 copolymers made of two poly(ethylene oxide) (PEO) blocks interspaced by a poly(propylene oxide)  
104 (PPO) block and follow the general basic formula: PEO<sub>x</sub>-PPO<sub>y</sub>-PEO<sub>x</sub>, where x and y are the size of PEO  
105 and PPO blocks, respectively (Table 1). In an aqueous environment and above the critical micelle  
106 concentration (CMC), the copolymers self-assemble into micelles, with the PEO chains forming a  
107 hydrophilic shell around a PPO hydrophobic core, within which lipophilic drugs can be solubilised,

108 drug-free fraction decreased and circulation time increased [10]. A variety of Pluronic block  
109 copolymers differing in the lengths of the EO and PO blocks are available for formulation with  
110 pharmaceutical drugs. Importantly the size of the hydrophobic block affects micellization and drug  
111 solubilisation[11]. Furthermore, combining different Pluronics® can enhance drug/micelle interactions  
112 and drug loading[12][13]. The PEO shell serves as a stabilizing layer between the hydrophobic core  
113 and the external medium, and prevents aggregation, plasma protein adsorption and opsonization and  
114 therefore recognition by the macrophages of the reticuloendothelial system [14]. Pluronic  
115 copolymers are also endowed with low cytotoxicity and weak immunogenicity in topical and systemic  
116 administration. Even though PEO–PPO–PEO materials are non-degradable, molecules with a  
117 molecular weight (MW) <70kDa can be filtered by the kidney and cleared in urine[15] (Table 1). In  
118 addition, Pluronics are recognised pharmaceutical excipients listed in the US and British  
119 Pharmacopoeia so have an established safety profile.

120 Thus Pluronics have attracted a great deal of attention in pharmaceutical applications as drug  
121 solubilisers [14] or controlled drug-release agents[16][13][17]. Notably, Pluronic P85, P105, F68 and  
122 L61 have been shown to inhibit efflux transporters (including P-gp and MRP1-2) and have potential to  
123 enhance drug passage across the BBB [18] [19][20] [21] [22][23][24][16][25][26][27]. They have all  
124 been approved as cosmetic ingredients [15] with F68 having been utilized as a blood substitute  
125 component[28]. Transporter-targeting Pluronics® (L61 and F127) have successfully completed a phase  
126 2 clinical trial for the intravenous treatment of adenocarcinoma of the upper gastrointestinal tract  
127 [29][30]. Interestingly, F127-based amphotericin B-containing micelles have been shown to be highly  
128 effective in treating *Leishmania amazonensis*-infected BALB/c mice [31], demonstrating that Pluronics  
129 have potential beyond the traditional role of simple micellar vessels for drug encapsulation and longer  
130 circulation, but are also active agents with key biological functions [32].

131

132 In this Medical Research Council (MRC) developmental pathway funding scheme (DPFS) multi-  
133 disciplinary study our team developed a milestone driven progression strategy (Fig 1) in order to  
134 assess the potential of pentamidine-Pluronic formulations to effectively treat stage 2 disease, reduce  
135 the major known side effect of pentamidine on the pancreas and shorten the length of treatment  
136 required to treat stage 1 disease. It was anticipated that the benefits of this approach would be a  
137 combined pentamidine-Pluronic formulation which would provide a single therapeutic entity for safer,  
138 simpler and more cost-effective treatment of all HAT stages using an established drug with a known  
139 safety profile. Four Pluronics were selected for evaluation based on their block-copolymer  
140 architecture, established safety profile and known ability to inhibit Pgp. These were P85, P105, F68  
141 and L61 (Table 1). An iterative approach was utilized as illustrated in Fig 1.

142

143 **Fig 1. NANOHAT project progression strategy.**

144 We screened approximately 30 pentamidine/Pluronic® formulations during this project using a  
145 rational, iterative approach. The three milestones were intended to ensure that the most appropriate  
146 formulations, on the basis of *in silico* and *in vitro* data, were taken forward to the *in vivo*  
147 pharmacokinetic studies and that the formulations with the greatest likelihood of success would be  
148 tested in the whole animal efficacy studies as outlined in the progression strategy.

149

150

## 151 2. Methods

### 152 2.1a Materials

153 Pentamidine (1,5-bis-4p-amidinophenoxy)pentane) isethionate salt (MW 592.68; 98% purity; catalogue  
154 number P0547) and Pluronic P105 (batch number BCBP8915V) were purchased from Sigma Aldrich  
155 (Poole, Dorset, UK). Pluronic P85 (mat 30085877 batch number: WPYE5378) was a kind donation from  
156 BASF plc (Cheshire, UK). Pluronic F68 (medical grade Catalogue number 2750016; batch numbers  
157 M7102 and MR29468) was purchased from MP Biomedicals, LLC (Illkirch Cedex, France). L61 was  
158 purchased from Aldrich (catalogue number 435422; batch number MKBH8737V).

159

### 160 2.1b Purity of excipients

161 All Pluronic formulations (F68, P105, P85 and L61) were tested for possible contamination due to the  
162 synthesis process and met specifications established by the US Pharmacopeia convention NF32  
163 monograph for polaxamers [15], in that the EO, PO and p-dioxane in the Pluronic were below 1, 5 and  
164 5 parts per million (ppm), respectively. This analysis was performed by an external specialist  
165 laboratory (Butterworth laboratories, Teddington, UK).

166

167 **Table 1. Pluronics used in this Study, with their Name, Block Composition, Hydrophilic-Lipophilic**  
168 **Balance (HLB) and General Formula. L, F, or P, Refers to Liquid, Flake, or Paste Physical Forms,**  
169 **respectively.**

| Poloxamer | Pluronic | MW   | Number of EO blocks | Number of PO blocks | HLB | Formula                                                     |
|-----------|----------|------|---------------------|---------------------|-----|-------------------------------------------------------------|
| 235       | P85      | 4600 | 52.27               | 39.66               | 16  | EO <sub>26.13</sub> PO <sub>39.66</sub> EO <sub>26.13</sub> |
| 335       | P105     | 6500 | 73.86               | 56.03               | 15  | EO <sub>36.93</sub> PO <sub>56.03</sub> EO <sub>36.93</sub> |
| 188       | F68      | 8400 | 152.73              | 28.97               | 29  | EO <sub>76.37</sub> PO <sub>28.97</sub> EO <sub>76.37</sub> |
| 181       | L61      | 1950 | 4.55                | 31.03               | 3   | EO <sub>2</sub> PO <sub>30</sub> EO <sub>2</sub>            |

170

### 171 2.2 Evaluation of potential neurotoxicity of pentamidine



172 New toxicities may arise following pentamidine's improved access to the CNS. The potential of  
173 pentamidine to cause neurotoxicity was evaluated by a brief review of the literature together with a  
174 neurological profiling screen and ion channel activity screens. The biological screens were performed  
175 by external specialist laboratories as described below.

176

177 **2.2a Neurological profiling screen.** A CNS side effect panel was custom designed and binding assays  
178 performed by Perkin-Elmer Science Discovery Systems (Hanover MD 21076, USA). Testing was  
179 performed at a single concentration of 1  $\mu\text{M}$  (100-times the trypanocidal concentration), with follow  
180 up concentration-response curves in any assay where there was greater than 70% inhibition to  
181 determine an inhibition constant ( $K_i$ ).

182

183 **2.2b Ion channel (hKir2.1) activity screens.** The *in vitro* effects of pentamidine isethionate on cloned  
184 hKir2.1 potassium channels (encoded by the human KCNJ2 gene) responsible for the  $I_{K1}$ , inwardly  
185 rectifying potassium current, were examined by ChantTest Corporation (Cleveland Ohio 44128, USA)  
186 to industry standards (Chantest FastPatch Assay; study number. 130827.DCC). Human epithelial  
187 kidney 293 (HEK293) cells (ATCC, Manassas VA USA) were stably transfected with the appropriate ion  
188 channel cDNA encoding the pore-forming channel unit. Cells were cultured in Dulbecco's Modified  
189 Eagle Medium / Nutrient Mixture F-12 (D-MEM/F-12) supplemented with 10% fetal bovine serum, 100  
190 U/mL penicillin G sodium, 100  $\mu\text{g}/\text{mL}$  streptomycin sulphate and 500  $\mu\text{g}/\text{mL}$  G418. Cultured cells were  
191 maintained in a tissue culture incubator set at 37°C in a humidified 95% air and 5%  $\text{CO}_2$  atmosphere.  
192 Pentamidine was dissolved in HEPES-buffered physiological saline containing 0.3% DMSO and  
193 sonicated (Model 2510/5510, Branson Ultrasonics, Danbury, CT) at room temperature for at least 20  
194 minutes. A glass-lined 96 well compound plate was loaded with the appropriate amount of test (five  
195 different concentrations) and positive control (100 $\mu\text{M}$   $\text{BaCl}_2$ ) solutions, and placed in the plate well of  
196 the QPatchHT (Sophion Bioscience A/S, Denmark). All experiments were performed at room  
197 temperature. Each cell acted as its own control. Vehicle was applied to naïve cells for a 5-10 minute

198 exposure interval. The test solution applied for a minimum of three minutes via the QPatch robot  
199 pipetting system to naïve cells ( $n \geq 2$ , where  $n$  = the number of cells/concentration). Each solution  
200 exchange on the QPatch, performed in quadruplicate, consisted of a 5  $\mu$ l exchange through the  
201 microfluidic flow channel, resulting in 100% replacement of the compound in the QPlate. Intracellular  
202 solution was loaded into the intracellular compartments of the QPlate planar electrode (130mM K-  
203 Asp, 5mM MgCl<sub>2</sub>, 5 mM EGTA, 4mM Tris-ATP and 10 mM HEPES). Cell suspension was pipetted into  
204 the extracellular compartments of the QPlate planar electrode.

205

206 Onset and steady state block of hKir2.1 current was measured using a ramp protocol with fixed  
207 amplitudes (hyperpolarization: -110 mV, 200 ms duration, followed by a 1-second ramp from -110 mV  
208 to +50 mV) repeated at 10 s intervals from a holding potential of -70 mV. Current amplitude was  
209 measured at the end of the step to -110 mV. Leak current was calculated and subtracted from the  
210 total membrane current record.

211

### 212 **2.3 Determination of the micellar aggregation properties of Pluronic**

213 The CMC, micellar size and aggregation number were determined in different solvents, using a unique  
214 combination of light and neutron scattering and atomistic simulations. We also measured the  
215 partitioning of pentamidine isethionate in selected Pluronic and the *in vitro* release profile.

216

217 **2.3a Preparation of solutions for physicochemical measurements** Unless stated, F68, P85, P105 or  
218 L61 were either dissolved in water (aqueous) or saline solution (0.9% w/v sodium chloride solution).  
219 Pluronic mixtures were also prepared either with a fixed mass ratio of 1:1 (F68-P105 or F68-P85) or in  
220 the case of L61, 0.01%. Samples were left to equilibrate for at least 3 hours prior to any  
221 measurement. Ultra-pure water (18.2 M $\Omega$ -cm - Millipore-filtered) was used throughout the  
222 experiments.

223

224 **2.3b: Phase behaviour.** In this study, L61 alone and in mixtures with one or two other Pluronics in  
225 both water (aqueous) and saline mediums were visually assessed from 20°C to 50°C in 5°C steps, plus  
226 37°C, to assess the impact of mixtures on L61 cloud point (24°C for a 1% solution) [33].

227

228 **2.3c CMC determination by fluorescence spectroscopy.** The CMC determines thermodynamic stability  
229 of the micelles during dilution of the drug delivery system in body fluids[17][11]. Furthermore, CMC is  
230 an important parameter in view of the biological response modifying effects of Pluronic block  
231 copolymers since it is needed to determine the maximum achievable concentration of the polymer  
232 single chains (“unimers”) [20]. For measurement of the CMC, pyrene (Sigma catalogue number 82648;  
233 pyrene puriss p.a. for fluorescence, ≥99%) was used as a probe. A stock solution of pyrene in acetone  
234 ( $1.7 \times 10^{-2}$  M) was initially prepared. A 35  $\mu$ L aliquot of this solution was placed in a 100 mL volumetric  
235 flask and the solvent was evaporated to air. The residue was then dissolved in either ultra-pure water  
236 (18.2 M $\Omega$ -cm - Millipore-filtered) or 0.9% w/v sodium chloride solution, resulting in a final  
237 concentration of pyrene of  $6 \times 10^{-6}$  M. These solutions were then subsequently used as the solvent for  
238 the polymer solutions. Stock solutions of each Pluronic in water and saline solution were prepared. An  
239 appropriate aliquot of these solutions were dissolved in the pyrene/H<sub>2</sub>O or pyrene/saline solution.  
240 Solutions of different polymer concentration were obtained by diluting the stock polymer solution  
241 with the appropriate solvent. Mixed samples of two Pluronics were also prepared either with a fixed  
242 ratio of 1:1 or containing 0.01% L61. Samples were left to equilibrate for at least 3 hours prior to the  
243 experiment.

244 The fluorescence emission spectra were recorded on a Cary Eclipse fluorescence spectrophotometer  
245 (Varian, Oxford, UK) with  $\lambda_{exc}$  = 340 nm. For the CMC, fluorescence intensities at 373, 384, 393 nm and,  
246 when it appeared, also at the excimer band centred at 490 nm, were measured. For each polymer, the  
247 critical aggregation concentration value was determined by using the intensity of the best resolved

248 peak. At least two repeats were performed for each sample. Measurements were performed at 20°C  
249 and 37°C.

250

251 **2.3d Stability testing** The purpose of stability testing is to check whether pentamidine becomes  
252 altered with time under the influence of a variety of environmental factors such as temperature,  
253 humidity and light (Climatic zone IV, 30°C and 65-75% relative humidity) [34].

254

255 In our initial 7 day assessment we also considered interaction of pentamidine with Pluronic as  
256 product-related factors may also influence its quality. A 5% or more change in initial content of  
257 pentamidine was considered significant. Pentamidine concentration at day 0, 10 and 7 was assessed  
258 by NMR.

259 A Bruker Advance 400 MHz spectrometer was used for recording the one-dimensional (1D) <sup>1</sup>H NMR.  
260 Solutions of PTI, PTI/P85, PTI/P105 and PTI/F68 were prepared in D<sub>2</sub>O (≥99.85% in deuterated  
261 component). Data were collected at days 0, 1 and 7. Samples were stored in amber NMR tubes at  
262 37°C.

263

264 **2.3e Partition coefficient determination.** The partitioning coefficient, *P*, determines the fraction of  
265 drug incorporated into the micelle and provides thermodynamic characterization for the stability of  
266 the drug-micelle complex during dilution within the body fluids[17][11].

267 The partition coefficient of pentamidine in the micellar core and bulk solvent, as described by Kabanov  
268 and co-workers [11], was measured for F68, P105 and mixtures of P105 and F68 (1:1), in both saline  
269 and aqueous solutions and at 20°C and 37°C.

270

271 The partition coefficient was obtained following the procedure described by Kabanov and co-workers  
272 [11], which is described briefly below. The partition coefficient is defined as:

273 
$$P = \frac{c_m}{c_{bulk}} \quad \text{Eq. 1}$$

274 where  $c_m$  is the PTI concentration in the micelle core and  $c_{bulk}$  is the PTI concentration in the  
275 bulk solvent.

276 The partition coefficient  $P$  can be obtained from[11]:

277 
$$P = \frac{1}{0.01 * \alpha * v} \quad \text{Eq. 2}$$

278 where,  $v$  ( $\text{cm}^3/\text{g}$ ), the partial molar specific volume, is defined as:

279 
$$v = \frac{1}{\rho_0} * \frac{1 - (\rho_s - \rho_0)}{c} \quad \text{Eq. 3}$$

280 with  $\rho_0$  ( $\text{g}\cdot\text{cm}^{-3}$ ) the solvent density,  $\rho_s$  ( $\text{g}\cdot\text{cm}^{-3}$ ) the density of the solution and  $C$  the polymer  
281 concentration ( $\text{g}\cdot\text{mL}^{-1}$ ).

282  $\alpha$  is defined as the angular coefficient of the plot  $(\frac{l - l_0}{l_{max} - l_0})^{-1}$  vs.  $(\text{Pluronic concentration} - cac)^{-1}$ , where  $l$   
283 is the fluorescence intensity of the solution,  $l_0$  is the intensity with no Pluronic present and  $l_{max}$  is the  
284 intensity at saturating concentration of the Pluronic,  $cac$  the critical aggregation concentration.

285

286 For the measurement of pentamidine isethionate salt (PTI) partition coefficient, a PTI  $1 \times 10^{-6}$  M in both  
287 water and saline solutions were initially prepared. These solutions were then subsequently used as  
288 the solvent for the polymer solutions and the preparation followed a similar method as for the CMC  
289 measurements. Samples were left to equilibrate for at least 3 hours prior to the experiment.

290

291 The fluorescence emission spectra were recorded on a Cary Eclipse fluorescence spectrophotometer  
292 (Varian, Oxford, UK) with  $\lambda_{exc} = 260\text{nm}$ , for pentamidine. The fluorescence emission intensity at ca  
293 340 nm was followed.

### 294 **2.3f Drug release.**

295 Solutions of Pluronic (1% F68 and 1% P105) with 10 mM PTI and PTI alone in water (2 mL) were loaded  
296 into 2 mL mini-dialysis tubes with 1 kDa molecular weight cut-off (GE Healthcare Bio-sciences Corp.

297 USA). The tube was immersed in a 200 mL closed Duran flask which was placed in a water bath at 37°C  
298 for the duration of the experiment. Aliquots were collected from the immersion water (ultra-pure  
299 water (18.2 MΩ·cm - Millipore-filtered) in the flask every 30 min for the first 2 hours, every hour for  
300 the next 5 hours and then once more after 1 week. At the end of the experiment, an aliquot was  
301 collected from the dialysis cell. PTI concentrations were determined by UV spectroscopy (wavelength  
302 260 nm).

303 The data was fitted to Ritger-Peppas model[35].

304

$$\frac{M}{M_{\infty}} = kt^n \quad \text{Eq. 4}$$

306

307 Where  $M$  and  $M_{\infty}$  are the cumulative amounts of drug released at time  $t$  and at infinite time,  
308 respectively;  $k$ , the reaction constant,  $t$  the time,  $n$ , the diffusional exponent describing the type of  
309 regime type:  $n=1$ , case II transport,  $n=0.5$ , Fickian diffusion,  $0.5 < n < 1$  non-Fickian diffusion.

310

### 311 **2.3g Dynamic light scattering (DLS).**

312 Dynamic light-scattering (DLS) were performed with a photon correlation spectrometer Malvern  
313 Zetasizer Nano with a laser wavelength of 633nm. For obtaining the reduced scattered intensity,  
314 toluene was used as the standard and the increment in the refractive index,  $\partial n/\partial c$ , was assumed to be  
315 independent on the temperature and taken as  $0.133 \pm 0.002 \text{ mL}\cdot\text{g}^{-1}$  [36]. The samples, of  
316 concentrations ranging between 1 to 5% w/v, were filtered prior to the measurements by 0.22 μm  
317 Millex syringe PVDF filters onto semi-micro glass cells. The temperature of the sample was controlled  
318 with 0.1°C accuracy by the built-in Peltier in the cell compartment. Size distributions were obtained  
319 for each sample from the analysis of the intensity autocorrelation function, which was performed with  
320 the Zetasizer software in the high resolution mode to distinguish overlapping distributions.

321

322 **2.3h Small-Angle Neutron Scattering (SANS).** The architecture of the nanocarriers was measured by  
323 SANS. The aggregation number ( $N_{agg}$ ) and radius micellar size, including volume of core and shell  
324 region, correlates directly with are relevant to properties such as drug loading encapsulation  
325 efficiency, stability, half-life and hence circulation time[37].

326 Small-angle neutron scattering experiments were performed on the LOQ instrument at ISIS  
327 pulsed neutron source (ISIS, Rutherford-Appleton Laboratory, STFC, Didcot, Oxford). LOQ uses  
328 incident wavelengths from 2.2 to 10.0 Å, sorted by time-of-flight, with a fixed sample-  
329 detector distance of 4.1 m, which provided a range of scattering vectors ( $q$ ) from 0.009 to  
330 0.29 Å<sup>-1</sup>.

331 The samples used in the SANS experiments were prepared in D<sub>2</sub>O to optimise the contrast with the  
332 protonated polymer. The samples were placed in clean disc-shaped quartz cells (Hellma) of 1 and 2  
333 mm path length and the measurements were carried out at 25°C and 37°C. All scattering data were  
334 first normalised for sample transmission and then background-corrected using a quartz cell filled with  
335 D<sub>2</sub>O (this process also removes the inherent instrumental background arising from vacuum and  
336 windows) and finally corrected for the linearity and efficiency of the detector response using  
337 instrument-specific software package. The data were then converted to the differential scattering  
338 cross-sections (in absolute units of cm<sup>-1</sup>) using the standard procedures at ISIS [38,39].

339 The curves were fitted to a core-shell sphere model combined with a structure factor for hard  
340 spheres, implemented in the Sasview software [40]. The initial fitting assumptions were a dry PPO  
341 core, i.e., the scattering length density (SLD) for the core was set to the SLD of PPO ( $3.44 \times 10^{-7}$  Å<sup>-2</sup>), the  
342 solvent as D<sub>2</sub>O (SLD of  $6.38 \times 10^{-6}$  Å<sup>-2</sup>) and the shell as dry PEO (SLD  $6.4 \times 10^{-7}$  Å<sup>-2</sup>). The SLD of core and  
343 solvent were kept fixed while the shell was left to vary as a high level of hydration of PEO is expected,  
344 as a result, the returned SLD should be an intermediate value between D<sub>2</sub>O and PEO. After obtaining a  
345 stable set of parameters, the SLD of the core was also let free to vary. Input values for the core radius  
346 and shell thickness were based on hydrodynamic radius values obtained by DLS. A term to

347 compensate for polydispersity was included for Pluronic (around 0.20), as well as a structure factor  
348 ( $S(q)$ ), corresponding to a hard sphere model, in order to account for intermicellar interactions.

349 Assuming that the shell SLD is a linear combination of the EO SLD and D<sub>2</sub>O SLD, i.e., the densities are  
350 additive, it is possible to calculate the solvent volume fraction in the shell using the following  
351 expression:

$$352 \quad \chi_{\text{solv}} = \frac{SLD_{\text{shell}} - SLD_{\text{EO}}}{SLD_{\text{D}_2\text{O}} - SLD_{\text{EO}}} \quad \text{Eq. 5}$$

353 The amount of solvent molecules in the shell than can be obtained from the ratios of the shell volume  
354 by the solvent molecular volume weighted by the solvent volume fraction:

$$355 \quad n_{\text{D}_2\text{O}} = \frac{\chi_{\text{solv}} \cdot V_{\text{shell}}}{V_{\text{D}_2\text{O}}} \quad \text{Eq. 6}$$

356 Furthermore, the total micelles volume is the sum of both Pluronic and D<sub>2</sub>O molecular volumes  
357 weighted by their respective volume fractions. Therefore, combining the total micelle volume (shell +  
358 core) minus the solvent contribution, it is possible to obtain the amount of Pluronic molecules present  
359 in the micelle and calculate the aggregation number of the micelles.

$$360 \quad N_{\text{agg}} = \frac{V_{\text{micelle}} - \chi_{\text{solv}} V_{\text{shell}}}{V_{\text{pluronic}}} \quad \text{Eq. 7}$$

361 The molecular volume of the Pluronic was approximated from the Pluronic molar volume ( $v_{\text{pluronic}}$ ) in  
362 water.

$$363 \quad V_{\text{pluronic}} = \frac{v_{\text{pluronic}}}{N_{\text{AV}}} \quad \text{Eq. 8}$$

364

365 **2.3i Simulations of Pluronic self-assembly and pentamidine encapsulation.** During the course of this  
366 project, we worked to develop a model of the Pluronic and pentamidine systems that would allow us  
367 to simulate the self-assembly of the polymers and the encapsulation of the drugs. In order to simulate  
368 the timescales and system sizes required to study these systems, we utilized a coarse-grain approach;  
369 dissipative particle dynamics (DPD)[41]. This method has been used to study Pluronic before and has  
370 been shown to represent expected phenomena well. So we used the simulation parameters from [42].

371



372 **2.4 Evaluation of potential peripheral toxicity of pentamidine ± Pluronic**

373 The toxicity of pentamidine in the presence of the Pluronic was explored using a variety of assays.

374 These included haemolysis, insulin secretion and membrane integrity assays.

375

376 **2.4a Haemolytic effects on human blood samples**

377 The proposed route of administration for our Pluronic formulations with pentamidine was intravenous,

378 hence the propensity for Pluronic to lyse red blood cells was studied using a haemolytic assay.

379

380 **2.4ai Chemicals.** Cyanmethaemoglobin (CMH) reagent, haemoglobin standard,  $\text{Ca}^{2+}/\text{Mg}^{2+}$  free

381 Dulbecco's Phosphate Buffered Saline (DPBS), DMSO, and Triton X-100 were purchased from Sigma-

382 Aldrich, Dorset, UK.

383

384 **2.4aii Research Donor Blood.** Healthy volunteer blood samples were drawn under the guidelines of

385 the Research Ethics Committee South East London REC 4 (10/H0807/99). Blood was collected in BD

386 vacutainer tubes containing lithium heparin as anticoagulant. Blood samples from two healthy

387 volunteers were collected and kept separate.

388

389 **2.4aiii Haemolysis Assay.** The assay is based on the protocol detailed by [43]. In order to determine

390 the total blood haemoglobin, the CMH method was used to map a standard curve based on the

391 absorption wavelength at 540 nm. Nine calibration standards were produced by preparing a stock

392 solution of 5 mg/ml (standard 1) using haemoglobin standards in CMH reagent and serially diluting it

393 to produce further standards of concentrations 2.5, 1, 0.80, 0.40, 0.20, 0.10, 0.05, and 0.025 mg/ml.

394 10% Triton X-100 (v/v) was prepared using distilled water to be used as the positive control. A 0.05%

395 solution of DMSO was prepared using distilled water and used as one of the negative controls. 0.9%

396 saline was another negative control. Pluronic samples were prepared in 0.9% saline. The test

397 concentrations of Pluronic (P85, P105 or F68) used were 0.01%, 0.1%, 0.25%, 1% or 5%.

398

399 A 5 ml vial of whole blood was centrifuged at 800 g for 15 minutes at room temperature. The  
400 supernatant was removed and the remainder was used to determine the plasma free haemoglobin  
401 (PFH) concentration.

402

403 200  $\mu$ l x 2 of each of the calibration standards prepared were then transferred onto the 96-well plate  
404 and 200  $\mu$ l x 4 of CMH reagent (control 1). Total blood haemoglobin (TBH) was then prepared by  
405 adding 20  $\mu$ l of the whole blood with 5 ml of CMH reagent. 200  $\mu$ l x 6 of TBH was transferred to the  
406 plate. 6 other wells were filled with 100  $\mu$ l of plasma to which 100  $\mu$ l of CMH reagent was added. After  
407 shaking it gently for a few minutes, the absorbance was read at 540 nm. Once the total haemoglobin  
408 concentration was adjusted to 10 mg/ml using  $\text{Ca}^{2+}/\text{Mg}^{2+}$  free DPBS, 20  $\mu$ l x 3 of the blank (control 2  
409 0.9% saline), positive control, negative control, or Pluronic samples were added to Eppendorf tubes.  
410 160  $\mu$ l of  $\text{Ca}^{2+}/\text{Mg}^{2+}$  free DPBS and 20  $\mu$ l of whole blood were then added to each tube except for one.  
411 20  $\mu$ l of  $\text{Ca}^{2+}/\text{Mg}^{2+}$  free DPBS was added instead. These served as control 3 without any blood enabling  
412 us to determine any interactions from Pluronic with the assay. These tubes were incubated for 3 hours  
413  $\pm$  15 minutes in a temperature-controlled shaker (THERMOstar, BMG labtech, Offenburg, Germany) at  
414 37 °C and 120 rpm. After the incubation, these were centrifuged at 800  $\times$  g for 15 minutes at room  
415 temperature. 100  $\mu$ l of the test samples and the controls were transferred to the 96-well plate. 100  $\mu$ l  
416 of CMH reagent was added to all these before measuring the absorbance spectrophotometrically at  
417 540 nm. Using the calibration curve mapped earlier, the haemoglobin concentration in each of the  
418 wells was determined. The dilution factor of 18 was also considered when calculating the  
419 haemoglobin concentration. Haemoglobin concentration was converted to percentage haemolysis  
420 compared to the negative control 0.05% DMSO. A significant increase compared to control at the 5%  
421 level was taken as positively haemolytic.

422

423 **2.4b Membrane integrity/cytotoxicity.**

424 Method is described as part of 2.5b and 2.6.

425

#### 426 **2.4c Insulin secretion and beta-cell viability.**

427 All tissue culture reagents were purchased from Sigma Aldrich (Poole, Dorset, UK).

428 Peripheral toxicity of pentamidine/Pluronic formulations to the endocrine pancreas was evaluated by  
429 quantifying  $\beta$ -cell viability and insulin secretion from the mouse MIN6  $\beta$ -cell line [44].

430

431 MIN6  $\beta$ -cells were maintained in culture at 37°C (95% air/5% CO<sub>2</sub>) in DMEM supplemented with 10%  
432 fetal bovine serum, 2mM L-glutamine and 100U.ml<sup>-1</sup>/0.1mg/ml<sup>-1</sup> penicillin / streptomycin, with a  
433 change of medium every 3 days. Cell were trypsinised (0.1% trypsin, 0.02% EDTA) when  
434 approximately 70% confluent and seeded into 96 well plates at a density of 3x10<sup>4</sup> cells/well. After a 24  
435 hour culture period to allow cells to adhere, the wells were washed with PBS and cells were pre-  
436 incubated for 2 hours in DMEM supplemented with 2mM glucose after which the medium was  
437 replaced with DMEM supplemented with Pluronic, pentamidine and Pluronic/pentamidine solutions.

438

439 The following formulations were evaluated: F68/PTI, P85/PTI and P105/PTI with Pluronic  
440 concentrations of 0, 0.01, 0.025, 0.1 and 0.5% w/v and PTI concentrations of 0, 1, 10 and 100  $\mu$ M (20  
441 formulations in total, including controls, Pluronic only, PTI only and solvent only were used). The cells  
442 were incubated under each treatment condition for 24 hours and then evaluated for their capacity to  
443 secrete insulin in response to 30 minute stimulation in the presence of 10  $\mu$ M forskolin and 100  $\mu$ M  
444 IBMX. Insulin secretion was measured by RIA [45]. The effect of the formulations on  $\beta$ -cell viability  
445 was assessed by determining the access of trypan blue to the cell interior, indicative of a compromised  
446 plasma membrane[46].

447

#### 448 **2.5 Blood-brain barrier studies**

##### 449 **2.5a Radiochemicals**

450 [<sup>3</sup>H(G)]pentamidine (specific activity, 31.9 Ci/mmol; concentration, 10.74 µg/ml; radiochemical purity,  
451 99.4%; MW 342.64) was custom synthesized and [<sup>14</sup>C(U)]sucrose (specific activity, 536 mCi/mmol;  
452 concentration, 67.07 µg/ml; radiochemical purity, 98.7%) was purchased from Moravek Biochemicals,  
453 California, USA.

454

#### 455 **2.5b *In vitro* permeability assays**

456 Several *in vitro* BBB models were evaluated for this study including Caco2 (permeability format),  
457 hCMEC-D3 (accumulation format), bEnd-3 (accumulation format) and MDCK-MDR (accumulation  
458 format) cell lines, before selecting the MDR1-MDCK cells (permeability format) as the most  
459 appropriate tool to address our objectives. MDR1-MDCK cells originate from transfection of Madin-  
460 Darby canine kidney (MDCK) cells with the MDR1 gene, the gene encoding for the human efflux  
461 protein, P-glycoprotein (P-gp). Using MDR1-MDCK cells avoids the complexities of multiple  
462 transporters by focusing specifically on P-gp.

463 **2.5bi Preparation of formulation** 1% (w/v) stock solutions of each Pluronic and 10 mM pentamidine  
464 isethionate were prepared in Hank's Balanced Salt Solution (HBSS) containing 25 mM HEPES and 4.45  
465 mM glucose, at pH 7.4. These were further diluted to give final concentrations of 0.01, 0.1 or 0.5%  
466 (w/v) Pluronic containing 10 µM pentamidine isethionate. Formulations were stored at room  
467 temperature for 2-4 days prior to use.

468 **2.5bii *In vitro* permeability assays.** MDR1-MDCK cells (NIH, Rockville, MD, USA) were maintained and  
469 permeability assays were performed at both Cyprotex (Macclesfield, Cheshire, UK) and King's College  
470 London. Analysis was by UPLC-MS/MS or liquid scintillation counting as appropriate.

471 Transmission electron microscopy confirmed appropriate cell morphology of a monolayer with  
472 microvilli on the apical membrane and Western blot confirmed expression of P-gp (data not shown).

473  $3.4 \times 10^5$  cells/cm<sup>2</sup> were seeded on Multiscreen™ plates with 0.4 μ polycarbonate Isopore™  
474 membranes (Millipore, MA, USA) in DMEM/High glucose (Sigma-Aldrich, UK , D6429) media containing  
475 1% Non-Essential Amino Acids and 10% foetal calf serum (both from Sigma-Aldrich, UK). Plates were  
476 maintained at 37°C/5% CO<sub>2</sub> for 4 days before use. On the day of the assay, DMEM was removed and  
477 both the apical and basolateral surfaces of the cell monolayer were washed twice with transport  
478 medium consisting of HBSS containing 25 mM HEPES and 4.45 mM glucose, (pH 7.40; 37°C). Plates  
479 were incubated for 40 minutes at 37°C/5% CO<sub>2</sub> to stabilize physiological conditions. Transport buffer  
480 was removed from the apical or basolateral chamber and replaced with the formulation to be tested.  
481 Samples were taken from the apical and basolateral compartments after 1 hour of incubation at 37  
482 °C/5% CO<sub>2</sub>. Samples, including the test formulation added to the apical chamber at t=0 were analysed  
483 at Cyprotex using UPLC-MS-MS method to quantify the pentamidine isethionate content or were  
484 analysed for radioactivity using a Tricarb 2900TR liquid scintillation counter.

485 **2.5biii UPLC-MS/MS.** Quantification of pentamidine isethionate was carried out on an ABSciex  
486 API5500 QTrap triple quadrupole mass spectrometer coupled to an Agilent 1290 Infinity UPLC system.  
487 A 10μl sample from the apical or basolateral chamber was diluted with 80 μl buffer and 160 μl  
488 methanol and centrifuged for 20 minutes at 1,400 × g. After centrifugation 90 μl of this was removed  
489 and diluted with 10 μl of the internal deuterated standard to give a final concentration of 10 nM. This  
490 was injected onto an Acquity™ HSS T3 (1.8 μm) column 2.1 x 50 mm (Waters Ltd, Herts, UK),  
491 equilibrated at 70 °C. Separation was carried out by gradient elution using a mixture of 0.1% formic  
492 acid in H<sub>2</sub>O (solvent A) and 0.1% formic acid in acetonitrile (solvent B), at a flow rate of 600 μL/min.  
493 Upon injection (10 μl), the mobile phase was held at initial conditions of 100% solvent A for 0.05  
494 minutes, the concentration of solvent B was then increased to 95% at 1.00 minute post-injection using  
495 a linear gradient and held for a further 0.40 minutes. The mobile phase was then returned to 100%  
496 solvent A at 1.41 minutes and held for a further 0.39 minutes. The eluent was analysed by MS/MS  
497 under positive ion electrospray mode and the multiple reaction monitoring transitions for

498 pentamidine and deuterated pentamidine were 341.174 to 119.984 m/z and 345.212 to 120.028 m/z  
499 respectively. Calibration curves were prepared using pentamidine and the internal standard over a  
500 concentration range of 0.0078 to 12  $\mu$ M. The column was washed with a weak wash: 9:1 H<sub>2</sub>O: MeCN  
501 and strong wash: 4:3:3 MeOH: isopropyl alcohol: acetone + 1% acetic acid between samples.

502

## 503 **2.6 Sensitivity of MDCK-MDR cells to Pluronic**

504 Permeability assay with 5  $\mu$ Ci (0.9  $\mu$ M) [<sup>14</sup>C(U)]sucrose alone in the presence of varying concentrations  
505 of Pluronic was used to assess the effect of Pluronic on monolayer integrity. Sucrose is a paracellular  
506 permeability marker and therefore any effects of Pluronic will lead to increased diffusion of  
507 [<sup>14</sup>C(U)]sucrose from apical to basolateral chambers as a result of compromised BBB integrity. The  
508 assay was carried out for an hour in the apical to basolateral direction only and the P<sub>app</sub> of  
509 radiolabelled sucrose determined at the end of the assay. Control for the assay was HBSS buffer alone.

510

## 511 **2.7 *In situ* perfusions**

512 The *in situ* brain/choroid plexus perfusion method for examination of the distribution of molecules  
513 into the brain and CSF is an established technique in the rat, guinea-pig and mouse [47][6][48]. It  
514 allows the passage of slowly moving molecules across the blood-brain and blood-CSF barriers to be  
515 examined and quantified in brain, capillary endothelial cells and choroid plexus tissue for perfusion  
516 periods up to 30 minutes.

517

518 **2.7a Preparation of formulation:** All formulations were prepared on the day of experiment at a  
519 Pluronic concentration of 0.1, 1.0 or 5% (w/v) using artificial plasma as a diluent. The artificial plasma  
520 consisted of a modified Krebs-Henseleit mammalian Ringer solution containing; 117 mM NaCl, 4.7 mM  
521 KCl, 2.5 mM CaCl<sub>2</sub>, 1.2 mM MgSO<sub>4</sub>, 24.8 mM NaHCO<sub>3</sub>, 1.2 mM KH<sub>2</sub>PO<sub>4</sub>, 39 g dextran, 1 g/L of bovine

522 serum albumin and 10mM glucose. [<sup>3</sup>H(G)]pentamidine was added to give a final concentration of  
523 157nM (equivalent to 5 μCi/ml). All formulations were stirred at room temperature for at least 1  
524 hour to allow any chemical interactions and micelle formation to stabilize.

525 **2.7b Animal studies:** Adult male BALB/c mice were purchased from Harlan UK Ltd (Oxon, UK). All  
526 animals were maintained under standard temperature/lighting conditions and given food and water  
527 *ad libitum*. Only mice above 23g in weight were used for experiments which were carried out within  
528 the framework of the Animals Scientific Procedures Act (1986) and Amendment Regulations 2012 and  
529 with consideration to the ARRIVE guidelines. The study was approved by the King's College London  
530 Animal Welfare and Ethical Review Body.

531

532 **2.7c *In situ* perfusions.** [<sup>3</sup>H(G)]pentamidine formulations were delivered to the brain using an *in situ*  
533 brain perfusion technique as previously described [6]. Briefly, mice were anaesthetized (mixture of 2  
534 mg/Kg Domitor™/150 mg/Kg ketamine administered via the intraperitoneal route) and heparinized  
535 (100 U ip.). Oxygenated artificial plasma (described above) at 37°C was pumped via a 25 gauge  
536 cannula into the left ventricle of the heart, with the right atrium severed to prevent recirculation.  
537 Pumps were calibrated to deliver an overall flow rate of 5 ml/min from the cannula.  
538 [<sup>3</sup>H(G)]pentamidine formulations (maintained at room temperature) were fed into the flow line from a  
539 dual syringe infusion pump (Harvard Apparatus, UK), at a rate of 0.5 ml/min such that the formulation  
540 was diluted 1/10 immediately prior to entering the heart. 11 μM [<sup>14</sup>C(U)]sucrose in artificial plasma  
541 (equivalent to 5 μCi/ml) was simultaneously fed into the flow line from a second identical syringe  
542 using the same pump set at 0.5 ml/min (equivalent to 1.1 μM or 0.5 μCi/ml entering the heart from  
543 the cannula). The perfusion was terminated at 10 minutes or 30 minutes, and the brain was sectioned  
544 as previously described [49]. Samples taken were those known to be invaded by parasites during  
545 second stage sleeping sickness and/or those which control mechanisms that are disrupted by the  
546 disease such as the sleep/wake cycle[6]. All samples were solubilized with 0.5 ml Solvable™

547 (PerkinElmer Life and Analytical Sciences, Buckinghamshire, UK) for 48 hours. Scintillation fluid (3.5 ml  
548 Luma Safe, PerkinElmer Life and Analytical Sciences) was added and radioactivity ( $^3\text{H}$  and  $^{14}\text{C}$ ) was  
549 counted on a Packard Tri-Carb2900TR scintillation counter in dual-label mode.

550 **2.7d Capillary depletion.** After the required samples were taken, the remaining brain tissue was  
551 homogenized and analyzed by the capillary depletion method described by Thomas & Segal [50]. This  
552 method uses dextran density gradient centrifugation to produce a vascular endothelial cell-enriched  
553 pellet and a brain parenchyma-containing supernatant from homogenized brain tissue. Thus the  
554 partitioning of a drug between the endothelial cells and the post-vascular brain parenchyma can be  
555 examined [51]. Briefly, the brain tissue was weighed and homogenized in a Dounce homogenizer with  
556 3 ml/g capillary depletion buffer [51] and 4 ml/g 26% dextran. The homogenate was separated by  
557 centrifugation at 5,400g and 4°C for 15 minutes. Homogenate, pellet and supernatant samples were  
558 solubilized and counted for radioactivity using the method described above.

559 **2.7e Expression of results.** The radioactivity (either  $^3\text{H}$  or  $^{14}\text{C}$ ) present in tissue samples (dpm/g) was  
560 expressed as a percentage of that measured in the artificial plasma (dpm/ml) and was termed  $R_{\text{TISSUE}\%}$ ,  
561 as previously described [49]. Where stated, measurements for [ $^3\text{H}(\text{G})$ ]pentamidine were corrected for  
562 the contribution of drug present in the vascular space by subtraction of the  $R_{\text{TISSUE}\%}$  for [ $^{14}\text{C}(\text{U})$ ]sucrose  
563 from the  $R_{\text{TISSUE}\%}$  of [ $^3\text{H}(\text{G})$ ]pentamidine and these corrected values were termed  $R_{\text{CORR TISSUE}\%}$ .

## 564 **2.8 Pharmacokinetic brain distribution experiments**

565 **2.8a In vivo pharmacokinetic experiments with [ $^3\text{H}(\text{G})$ ]pentamidine.** Formulations containing 0.025%  
566 F68 with 8  $\mu\text{M}$  [ $^3\text{H}(\text{G})$ ]pentamidine, 0.5% F68 with 8  $\mu\text{M}$  [ $^3\text{H}(\text{G})$ ]pentamidine and 8  $\mu\text{M}$   
567 [ $^3\text{H}(\text{G})$ ]pentamidine alone were prepared in 0.9% sterile saline and allowed to equilibrate at room  
568 temperature for at least 1 hour before use. A 200  $\mu\text{l}$  bolus of the formulation to be tested (equivalent  
569 to 15  $\mu\text{Ci}$  [ $^3\text{H}(\text{G})$ ]pentamidine) was administered to mice via the tail vein. At 2 hours post-injection,  
570 mice were exsanguinated via the right atrium of the heart into a heparinised syringe then perfused for



571 2.5 minutes with [ $^{14}\text{C}(\text{U})$ ]sucrose (1.1  $\mu\text{M}$ , 0.5  $\mu\text{Ci/ml}$ ) via the left ventricle, (all mice were  
572 anaesthetised with Domitor™/ketamine and heparinised 20 minutes prior to exsanguination). Whole  
573 blood samples were immediately centrifuged for 15 minutes at  $5,400 \times g$  to remove red blood cells  
574 and the resulting plasma was placed on ice. A CSF sample was taken from the cisterna magna, the  
575 IVth ventricle choroid plexus and pituitary gland were collected and the brain was sectioned into right  
576 brain and left brain (both comprising frontal cortex and caudate putamen), cerebellum and midbrain  
577 (including pons and hypothalamus). The remaining brain (including occipital cortex and hippocampus)  
578 was used for capillary depletion analysis and all brain, circumventricular organs (CVO) and plasma  
579 samples were solubilized and subjected to dual label ( $^3\text{H}/^{14}\text{C}$ ) scintillation counting as previously  
580 described.

581 **2.8b In vivo pharmacokinetic experiments with pentamidine isethionate.** Adult female CD1 mice  
582 (20-25g) were injected intravenously with pentamidine isethionate (4 mg/kg in 0.9% physiological  
583 saline) in the absence and presence of concomitant dosing with F68 (initial plasma concentration,  
584 calculated by estimating plasma volume at 10% of body weight) at 0.025%. Each group had an  $n = 3$ .  
585 Blood ( $<10 \mu\text{l}$ ) was collected using a heparinized syringe at 1, 30, 120, 600 minutes post-injection and  
586 plasma prepared. Both blood and plasma samples were snap frozen on dry ice and stored at  $-80^\circ\text{C}$   
587 before analysis. After the last blood sample, the mice were perfused with sterile 0.9% physiological  
588 saline (via the hepatic portal vein), the brains removed, weighed and snap frozen. Analysis of samples  
589 was by a validated weak cation exchange solid phase extraction (WCX-SPE) approach performed by a  
590 specialist contract research organization (Cyprotex). Briefly samples were diluted with water, WCX-  
591 SPE sorbent was primed with MeOH and then water (to ensure phase was fully ionised). Samples  
592 were then loaded onto sorbent and washed with pH7 buffer and MeOH. Pentamidine was then  
593 washed off sorbent by eluting with a combination of MeOH/ $\text{H}_2\text{O}$  + 5% v/v formic acid. If necessary  
594 samples were then evaporated to dryness and reconstituted in injection solvent. Samples were

595 analysed by UPLC-MS/MS as described above. LLOQ in plasma samples was 2 ng/ml and in brain  
596 samples was 80 ng/ml.

597 Additional experiments revealed that intravenous administration of 10mg/kg pentamidine isethionate  
598 plus or minus 0.5% F68 was toxic to the mice and the experiment was terminated.

599 **Data analysis.** All data are presented as means  $\pm$ S.E.M and statistical analysis was carried out using  
600 Sigma Stat software, version 12.0 (SPSS Science Software UK Ltd, Birmingham, UK).

## 601 **2.9 Trypanocidal activity *in vitro***

602

603 *In vitro* activity of drug formulations against *Trypanosoma brucei* blood stream form trypomastigotes  
604 was determined *in vitro* using Alamar Blue (resazurin: Bio-Source, Camarillo, CA) as described by [52].

605 Prior to determination of the trypanocidal activity of Pluronic-pentamidine combinations, the IC<sub>50</sub>  
606 values of the Pluronic alone was established. Each Pluronic was tested in a 3-fold serial dilution in  
607 triplicate and in three separate experiments (n=3). The diluent was HMI-9 media (Invitrogen, UK).

608 Blood stream form *T. b. brucei* (strain S427) trypomastigotes, cultured in modified HMI-9 media  
609 supplemented with 10% v/v heat-inactivated foetal calf serum, (hi-FCS, Gibco, Life Technologies,

610 UK), were incubated (37°C; 5% CO<sub>2</sub>) at a density of 2 x 10<sup>4</sup>/ml in the presence of pentamidine alone or  
611 pentamidine-Pluronic formulations for 66h. Resazurin (20  $\mu$ l 0.49mM in PBS) solution was then added

612 to each well and incubation continued for 6 hours. After incubation, samples were removed and  
613 fluorescence was measured using excitation 530nm and emission 590nm on a Spectramax M3 plate

614 reader (Molecular Devices, USA). IC<sub>50</sub> values were determined (where appropriate) using GraphPad  
615 Prism.

616

## 617 3. Results

### 618 3.1 Evaluation of potential neurotoxicity of pentamidine

619 **3.1a Literature review.** We conducted a brief review of the literature to assess the potential  
620 neurotoxicity of pentamidine. Information was considered relevant to the NanoHAT project if it  
621 described an activity that could be detected in a simple profiling screen, rather than secondary  
622 readouts (e.g. hERG-mediated, downstream effects on cardiomyocyte  $[Ca^{2+}]_i$ ). Table 2 lists the known  
623 pharmacology and approximate affinities of the interaction that have been reported for this  
624 compound.

625 As the trypanocidal activity of pentamidine occurs at around 10 nM *in vitro*[53], we considered that  
626 any affinity greater than 1  $\mu$ M (i.e. more than 100-fold greater than the trypanocidal concentration)  
627 was unlikely to be relevant.

628

629 **Table 2. Reported Pharmacology of Pentamidine *in vitro*.**

| Property                              | Affinity ( $\mu$ M) | Comments                                  | Reference  |
|---------------------------------------|---------------------|-------------------------------------------|------------|
| Trypanocidal                          | 0.01                | Time-dependent                            | [53]       |
| Imidazoline <sub>2</sub> receptor     | 0.014               | 3H-idazoxan binding                       | [54]       |
| Potassium channel expression/function | 0.17                | K(v)11.1(hERG) expression, K(IR)2.1 block | [55]; [56] |
| NMDA (Ionotropic) glutamate receptor  | 0.2                 | Voltage dependent                         | [57]       |
| Human anti-platelet                   | 1.1                 | Inhibits fibrinogen binding to GP11b/IIIa | [58]       |
| Rat NMDA receptor                     | 1.8                 | Rat brain membrane 3H-dizocilpine binding | [59]       |
| PRL phosphatases                      | 3                   | Oncology target                           | [60]       |
| Delta2glutamate receptor              | 5                   | Voltage independent                       | [57]       |
| Calmodulin antagonist                 | 30                  | Inhibits nNO synthase                     | [61]       |

|                                  |      |                 |      |
|----------------------------------|------|-----------------|------|
|                                  |      | <i>in vitro</i> |      |
| Acid sensing ion channels (ASIC) | 38   | Potency         | [62] |
| Serine proteases                 | 4000 | 1b>3>2a>or=1a   | [63] |

630

631 There are 3 major target families for which pentamidine has significant affinity (<20 fold above  
632 trypanocidal range) that were of concern: the imidazoline<sub>2</sub> receptor (responsible for effects on central  
633 blood pressure control and pancreatic beta cells); inward rectifying (IR) potassium channels  
634 particularly blockade of Kir2.1 (this is more likely cardiac than CNS-relevant) and NMDA glutamate  
635 receptors.

636

### 637 **3.1b A neurological profiling screen**

638 A wide ligand profiling screen was carried out against 40 CNS targets (Perkin Elmer customised CNS  
639 screening; listed in Table S1), testing at a single concentration of 10 µM (1000-times the trypanocidal  
640 concentration), with follow up concentration-response curves in any assay where there was greater  
641 than 70% inhibition. Pentamidine was inactive at 29 out of 40 CNS targets (including 5 glutamate  
642 receptor binding sites) at 10 µM, and was re-tested against the remaining targets at a range of  
643 concentrations to generate an inhibitory constant, K<sub>i</sub>. These results, together with the calculated  
644 relative selectivity values compared with trypanocidal affinity, are listed in Table 3.

645

646 **Table 3. K<sub>i</sub> Values for Pentamidine Determined for Selected CNS targets.**

| Target                     | K <sub>i</sub> (µM) | Relative to trypanocidal activity |
|----------------------------|---------------------|-----------------------------------|
| Trypanocidal Activity      | 0.01                | 1.0                               |
| Imidazoline 1 <sub>2</sub> | 0.001               | 0.1                               |
| Monoamine oxidase B        | 0.181               | 18                                |
| Monoamine oxidase A        | 0.217               | 22                                |
| Adrenergic alpha1          | 0.273               | 27                                |

|                      |       |                                        |
|----------------------|-------|----------------------------------------|
| Muscarinic (central) | 0.281 | 28                                     |
| Histamine H2         | 7.21  | 721                                    |
| Opioid               | 1.41  | 141                                    |
| DA transporter       | 2.11  | 211                                    |
| Adrenergicalpha2     | 10    | 1000 Estimate from single-point screen |
| Adrenergic $\beta$   | 10    | 1000 Estimate from single-point screen |
| 5HT transporter      | 10    | 1000 Estimate from single-point screen |

647

648 Selectivity screening of pentamidine identified 5 targets (imidazoline I<sub>2</sub> receptor; monoamine oxidase  
649 A and B; adrenergic  $\alpha_1$  receptor; muscarinic receptor) for which it has significant affinity, and which  
650 should be monitored as we progressed through the screening cascade. In particular, pentamidine's  
651 high affinity for the imidazoline receptor may explain the cardiovascular adverse events associated  
652 with this drug. The project team considered that remaining targets were of minor concern, as the  
653 adverse events of drugs targeting the adrenergic monoamine oxidase and muscarinic systems are  
654 reasonably well described. The relatively low affinity of pentamidine for the remaining targets  
655 (histamine H<sub>2</sub> receptor; opioid receptor; adrenergic  $\alpha_2$ ,  $\beta$  receptors; 5HT transporter) indicated that  
656 the drug was unlikely to have significant effects until plasma/brain levels exceeded ~ 100-fold the  
657 trypanocidal concentration.

658

### 659 **3.1c Ion channel screen**

660 We carried out ion channel screening at Chantest in order to investigate the potential potassium  
661 (K<sub>IR</sub>2.1) blocking liability reported by de Boer et al., (2010) (Table 2). Pentamidine isethionate salt  
662 was evaluated at 0.001, 0.01, 0.1, 1 and 10  $\mu$ M (Table S2). The IC<sub>50</sub> value for pentamidine isethionate  
663 salt could not be calculated as the highest tested concentration resulted in hKir2.1 inhibition less than  
664 50% (i.e. 12.3 $\pm$ 1.3%). The IC<sub>50</sub> is estimated to be greater than 10  $\mu$ M. The positive control (100  $\mu$ M  
665 barium) confirms the sensitivity of the test system to ion channel inhibition.

666

## 667 **3.2 Formulation Development**

668 As this was a milestone driven project an iterative, dynamic approach was utilized to select the lead  
669 formulation to take forward as quickly as possible in the screening cascade (Fig 1), hence not all  
670 Pluronic formulations were assessed with each of the methods.

671

### 672 **3.2a Phase Behaviour**

673 L61 phase diagrams were evaluated by visual inspection from 20°C to 50°C for L61 alone and in  
674 mixtures with P105 and/or F68 in water and saline solutions. L61 presents a cloud point around 24°C  
675 [64] and F68 does not improve its solubility, while P105 does to some extent (Tables S3 and S4).

676

### 677 **3.2b. Critical micelle concentration (CMC) by fluorescence spectroscopy**

678 CMC were measured for individual Pluronic and mixtures of F68, P85, P105 and L61 at 20°C and 37°C,  
679 both in aqueous and saline (0.9 wt%) solutions, using the intensity of pyrene fluorescence emissions  
680 (Table 4; Fig S2). Mixtures of two Pluronics in both aqueous (aq) and saline (sal) mediums were  
681 prepared in either a fixed mass ratio of 1:1 or with the addition of 0.01% w/v L61 and the CMC  
682 determined. All CMC curves show two inflection points, a feature widely reported in the literature;  
683 the first corresponds to the onset of aggregation and was chosen as the CMC (Fig S2; Table 4), giving  
684 the following values in saline solution at 37°C (g/L):  $P85_{sal}=0.042\pm 0.018$ ;  $F68_{sal}=0.048\pm 0.012$  and  
685  $P105_{sal}=0.069\pm 0.020$ . Overall, these CMC values are fairly similar and do not allow a prioritisation  
686 based on CMC alone. The CMC of F68 and P85 mixtures (1:1 mass ratio) is about double the CMC,  
687 when expressed in total Pluronic mass, of the individual polymers suggesting the absence of mixed  
688 micelles in these mixtures. Small amounts of L61 (0.01%w/v) does not affect the CMC of F68 or P85 or  
689 P105 under the conditions tested.

690

691 **Table 4. CMC Values of Pluronic Dissolved in Pure Water (aq) or Saline (sal) at 20°C and 37°C**  
692 **Determined Using Pyrene Fluorescence Intensity. Values Mean  $\pm$  S.D. Saline (0.9 wt%).**  
693

| Temperature                        | 20°C          | 37°C          |
|------------------------------------|---------------|---------------|
| Sample                             | g/L           | g/L           |
|                                    | CMC           | CMC           |
| P85 <sub>aq</sub>                  | 0.3197±0.0067 | 0.0432±0.0075 |
| P85 <sub>sal</sub>                 | 0.1460±0.0311 | 0.0424±0.0178 |
| F68 <sub>aq</sub>                  | 0.2737±0.0311 | 0.0606±0.0045 |
| F68 <sub>sal</sub>                 | 0.2730±0.0029 | 0.0476±0.0119 |
| P105 <sub>aq</sub>                 | 0.2429±0.0140 | 0.0730±0.0136 |
| P105 <sub>sal</sub>                | 0.1905±0.0093 | 0.0686±0.0191 |
| L61 <sub>aq</sub>                  | 0.0299±0.0320 | n.a.          |
| L61 <sub>sal</sub>                 | 0.0240±0.0236 | n.a.          |
| <b>Fixed ratio 1:1 mixtures</b>    |               |               |
| P85+F68 <sub>aq</sub>              | 0.7415±0.0000 | 0.0951±0.0000 |
| P85+F68 <sub>sal</sub>             | 0.6777±0.0000 | 0.0993±0.0000 |
| P85+L61 <sub>aq</sub>              | 0.2678±0.0000 | n.a.          |
| P85+L61 <sub>sal</sub>             | 0.3024±0.0000 | n.a.          |
| <b>Sample<br/>+ L61 (0.01w/v%)</b> |               |               |
| P85 <sub>aq</sub>                  | 0.1135±0.0035 | 0.0508±0.0264 |
| P85 <sub>sal</sub>                 | 0.2836±0.1278 | 0.0734±0.0316 |
| F68 <sub>aq</sub>                  | 0.2010±0.0042 | 0.0510±0.0177 |
| F68 <sub>sal</sub>                 | 0.2060±0.0283 | 0.0430±0.0000 |
| P105 <sub>aq</sub>                 | 0.2421±0.0298 | 0.0705±0.0237 |
| P105 <sub>sal</sub>                | 0.1938±0.0139 | 0.0833±0.0475 |

694

### 695 **3.2c Stability of the formulations:**

696 Pentamidine stability in solution was followed by NMR. Pentamidine and pentamidine/Pluronic  
697 solutions prepared in D<sub>2</sub>O were kept in amber NMR tubes at 37°C. Spectra were measured at days 0, 1  
698 and 7. As a control, pentamidine in D<sub>2</sub>O was left at 4°C and measured at day 0 and 7. NMR data  
699 showed no significant change on peak position or peak intensity when compared to day 0

700 measurements or to control samples, confirming no thermal degradation of pentamidine after 7 days  
701 at 37°C.

702

### 703 **3.3d Partition**

704 Partition of PTI in the micelles was measured by fluorescence spectroscopy for P105 and F68.  
705 Pentamidine has a slightly larger partition coefficient in F68 than in P105 (Table 5). Measurements in  
706 mixtures (F68/L61, P105/L61 and F68/P105, 1:1 mass ratio in all cases) do not significantly change the  
707 partition coefficient (data not shown).

708 The values of Log P obtained in saline and aqueous solutions are rather similar, suggesting that  
709 pentamidine partition is not sensitive to the saline levels used here.

710 The effect of temperature is quite weak (Table 5), and does not follow the same trend with the two  
711 Pluronic studied: values of LogP for P105 are lower at 20°C than at 37°C (but still very close); instead,  
712 for F68 the partition of PTI decreases slightly at higher temperature.

713 At biologically relevant concentrations, 0.5 wt% Pluronics and  $1.0 \times 10^{-6}$  M PTI, extrapolation of the Log  
714 P data suggest that ca. 0.1 PTI molecules would be incorporated in one P105 micelle, and 0.01 PTI  
715 molecules in one F68 micelle. At the concentrations used for SANS (5 wt% Pluronic and 1 wt% PTI),  
716 extrapolating these numbers give 166 PTI molecules in the micellar core per P105 micelle and 15 for  
717 F68 micelle.

718 The relative low values of log P for PTI/Pluronic system (for comparison log P for pyrene/Pluronics is  
719 ca. 2.5 and 3.5 for F68 and P105, respectively [11]), is not surprising given the high water solubility of  
720 pentamidine, and helps to explain the drug release profile for PTI / Pluronics systems discussed next.

721 Overall, this means that Pluronic have a limited capacity to interact with pentamidine and prolong its  
722 circulation.

723

724 **Table 5. The fraction of pentamidine incorporated into the Pluronic micelle expressed as a**  
725 **partitioning coefficient, P. The Pluronic was dissolved in pure water (aqueous) or saline (saline) at**  
726 **20°C and 37°C. (Also see Fig S3).**



727

| Pluronic | Solvent | Temperature<br>°C | Log P |
|----------|---------|-------------------|-------|
| P105     | saline  | 20                | 1.06  |
|          |         | 37                | 1.15  |
| P105     | water   | 20                | 0.99  |
|          |         | 37                | 1.09  |
| F68      | saline  | 20                | 1.67  |
|          |         | 37                | 1.47  |
| F68      | water   | 20                | 1.67  |
|          |         | 37                | 1.46  |

728

729 ***e. Drug release***

730 Solutions of 10 mM pentamidine or 10 mM pentamidine plus 1 % F68 or 1% P105 were loaded in  
731 dialysis cells and the amount of pentamidine eluting from the cells into water at 37°C were measured  
732 over time (Fig S4). Both reaction type and reaction constant, for PTI alone and PTI/Pluronic were in a  
733 similar range. ca. 0.5 (Fickian diffusion) for reaction type and ca 0.3 for reaction constant. No  
734 significant difference was observed between PTI/Pluronics and PTI/water systems. Thus in the  
735 conditions tested, pentamidine release seems to be dominated by diffusion and Pluronic micelles  
736 were not a barrier for drug release.

737

738 ***f. Aggregation number and Micellar size:***

739 Pluronic micelles can be reasonably described as a compact core formed by a dry PPO block  
740 surrounded by a highly hydrated shell formed by the two PEO blocks[65][66]. The core-shell model  
741 was thus used to provide a more detailed characterisation of the morphology of the Pluronic  
742 micelles in D<sub>2</sub>O and how it is affected by the presence of PTI, using input values for the core radius  
743 and shell thickness were based on hydrodynamic radius values obtained by DLS (Table 6). A term  
744 to compensate for polydispersity was included for both Pluronics, as well as a structure factor  
745 ( $S(q)$ ), corresponding to a hard sphere model, in order to account for intermicellar interactions. A

746 summary of the main parameters obtained from the analysis of the data (Fig S5) is present in  
747 Table 7.

748

749 **Table 6. Stokes Radii of P105, P85 and F68 Micelles Obtained from DLS (1% w/w, 37°C).**

| Pluronic <sub>(aq)</sub>  | Radius (nm) | Pluronic <sub>(saline)</sub> | Radius (nm) |
|---------------------------|-------------|------------------------------|-------------|
| F68                       | 2.8         | F68                          | 2.5         |
| P85                       | 6.6         | P85                          | 6.5         |
| P105                      | 8.1         | P105                         | 8.0         |
| [PTI]= 10 <sup>-6</sup> M |             | [PTI]= 10 <sup>-6</sup> M    |             |
| F68                       | 2.8         | F68                          | 2.6         |
| P85                       | 6.6         | P85                          | 7.8         |
| P105                      | 7.7         | P105                         | 6.7         |
| PTI - 1:3 mass ratio      |             | PTI - 1:3 mass ratio         |             |
| F68                       | 2.3         | F68                          | 3.1         |
| P85                       | 6.8         | P85                          | 6.5         |
| P105                      | 8.1         | P105                         | 8.0         |

750

751 **Table 7. Geometric parameters from model-fitting of the SANS Pluronic data at 37°C,**  
752 **including core and shell micellar sizes, fraction of solvent in the corona ( $\chi_{solv}$ ) and**  
753 **aggregation number ( $N_{agg}$ ). (Also see Fig S5).**

| Sample         | Core radius (Å) | Shell thickness (Å) | Total radius (Å) | $\chi_{solv}$ | $N_{agg}$ |
|----------------|-----------------|---------------------|------------------|---------------|-----------|
| F68 5%         | 15.4            | 36.5                | 52.0             | 0.99          | 2.37      |
| F68 5%/ PTI 1% | 15.1            | 34.7                | 49.8             | 0.98          | 2.25      |
| F68 5%/ PTI 3% | 15.5            | 33.9                | 49.4             | 0.99          | 2.38      |
| P85 5%         | 42.9            | 31.4                | 74.3             | 0.95          | 35.4      |
| P85 5%/ PTI 1% | 41.5            | 30.5                | 72.0             | 0.95          | 32.4      |
| P85 5%/ PTI 3% | 41.0            | 30.5                | 71.5             | 0.99          | 31.6      |

754

755 A direct comparison of F68 and P85 micelles in D<sub>2</sub>O shows that both have similar shell thickness, with  
756 F68 showing values slightly larger, 36.5 Å vs 31.4 Å, respectively. It is worth noting that F68 EO blocks  
757 have on average 76.4 EO units while P85 blocks are only 26.1 units long. The core of F68 micelles are  
758 significantly smaller than P85 micelles, 15.4 vs 42.9 Å. In terms of PO content, the F68 PO block is 29  
759 units long while P85 is 40 units long. Overall, P85 micelles are larger than F68 micelles, 74.3 vs 52.0 Å,  
760 respectively.

761

762 The simulation work agrees well with these experimental results. The average aggregation number  
763 per micelle ( $N_{agg}$ ) and the average number of micelles ( $N_{mic}$ ) were calculated once the systems had  
764 equilibrated have been measured. Fig 2 shows plots of  $N_{agg}$  and  $N_{mic}$  as a function of Pluronic  
765 concentration for both the F68 and P105 Pluronics. We carried out simulations over a range of  
766 Pluronic concentrations that span the CAC and the CMC values observed experimentally to validate  
767 the models (at least qualitatively). From Fig 2, one can see that in both systems, once we have passed  
768 the CAC the number of micelles remains more or less constant but they continue to grow in size as the  
769 concentration increases until we reach the CMC at which point the size of the micelles more or less  
770 plateaus. Also, when comparing the behavior of the F68 and P105 Pluronics, we found that the P105  
771 Pluronics form larger aggregates when near the CMC as compared to that for the F68 Pluronics, and  
772 therefore fewer micelles. Note, we have also simulated mixtures of F68 and L61 Pluronics, and the  
773 results of those systems are presented in Fig S6.

774

775 **Fig 2. The average number of Pluronic molecules found in a micelle ( $N_{agg}$ ) and the number of**  
776 **micelles in our system (after they have equilibrated) ( $N_{mic}$ ) as a function of the concentration**  
777 **of the Pluronics in the system for both the F68 (left) and P105 (right) Pluronics.** Additionally,  
778 we have compared the findings from the simulations with the identified values (dashed lines) of  
779 the CAC and CMC from the experimental systems.

780

781 In the presence of 1% PTI, a small reduction in size was observed for both Pluronics, ca. 2 Å in both  
782 cases. The increase to 3% PTI does not cause further changes.

783 The coronas were highly hydrated, as reported for these polymers [67][68]. F68 micelles were more  
784 hydrated than P85: for each EO unit in the shell, there were are 17 D<sub>2</sub>O molecules in a F68 micelle but  
785 only 3.4 in a P85 micelle.

786 The addition of pentamidine leads to a subtle, but perceptible, reduction of the number of water  
787 molecules in the F68 micelle shell. For P85, no measurable changes were observed.

788

### 789 **3.3 Peripheral Toxicity**

790 Pluronic concentrations used in the biological assays were based on the CMC measurements.

791 Peripheral toxicity of the individual polymers was assessed. L61 was not studied at this stage due to  
792 its limited solubility.

793

#### 794 **a. Haemolysis assay**

795 All the Pluronics (P85, F68 and P105) at each of the tested concentrations (0.01%, 0.1%, 0.25%, 1% or  
796 5%) and both the negative controls (0.05% DMSO or 0.9% saline) did not cause any haemolysis (0%) of  
797 the human cells. In contrast the positive control, 10% Triton X-100, caused haemolysis (\*\*p<0.001  
798 compared to the negative controls).

799

#### 800 **b. Permeability assay (MDCK-MDR) to assess membrane integrity**

801 [<sup>14</sup>C(U)]sucrose is an inert, polar molecule which normally does not cross cell membranes, but may  
802 cross between cells through the paracellular cleft. Significant differences in [<sup>14</sup>C(U)]sucrose P<sub>app</sub> values  
803 existed in the presence of all tested concentrations of P85, and 0.5% and 0.01% P105 compared to  
804 [<sup>14</sup>C(U)]sucrose P<sub>app</sub> in the absence of Pluronic (Fig S7) indicating loss of monolayer integrity. No  
805 tested concentration of F68 significantly affected the radiolabelled sucrose P<sub>app</sub> values.

806

#### 807 **c. Effect of Pluronic on insulin secretion and beta-cell viability**

808 Exposure of MIN6  $\beta$ -cells to 1 and 100 $\mu$ M pentamidine for 24 hours caused a concentration-  
809 dependent inhibition of acute insulin secretion in response to the cyclic AMP elevating agents  
810 forskolin and IBMX (Fig 3). Surprisingly, P85 and 105 were significantly more effective than  
811 pentamidine in inhibiting insulin secretion in response to forskolin/IBMX, such that insulin release was  
812 fully inhibited by these Pluronics in the absence of pentamidine at all concentrations tested (0.01-0.5%  
813 w/v) (Fig 3A-D). Low concentrations of F68 (0.01 and 0.025% w/v) generated similar inhibitory effects  
814 on insulin secretion as unformulated pentamidine (Fig 3A-B) and increased toxicity was observed with  
815 higher concentrations of F68 (Fig 3C-D).

816

817 **Fig 3. The effect of Pluronic and pentamidine in DMEM on insulin secretion from MIN6  $\beta$ -cells**  
818 **expressed as a percentage of control.** Control values were obtained from DMEM supplemented with  
819 2mM glucose. (A-D) P85 and P105 induced a strong suppression of insulin secretion from MIN6  $\beta$ -cells  
820 even at low concentrations. (C-D) F68 only induced insulin secretion suppression at concentrations  
821  $\geq 0.1\%$  w/v.

822

823 Trypan blue staining indicated that the MIN6  $\beta$ -cells were able to tolerate pentamidine concentrations  
824 of 1 and 10  $\mu$ M, but 100  $\mu$ M pentamidine, which induced maximal inhibition of insulin secretion, was  
825 accompanied by a large number of cells taking up Trypan blue (Fig S8 and S9). These micrographs are  
826 indicative of the suppression of insulin secretion by pentamidine being associated with marked  
827 reductions in  $\beta$ -cell viability, but the plasma membrane was largely intact as there was no leakage of  
828 insulin, a 5.5 kDa peptide, from the cell interior. The combination of 100  $\mu$ M pentamidine with 0.5%  
829 w/v F68, which caused maximal suppression of insulin release (Fig 3), led to the highest proportion of  
830 cells that showed Trypan blue staining.

831

### 832 **3.4 Trypanocidal activity in vitro**

833 *The In vitro* activity of Pluronic drug formulations alone against *T. b. brucei* blood stream form  
834 trypomastigotes was determined showing low trypanocidal activity of F68 compared to high activity of  
835 P85 and P105 (Table 8).

836 **Table 8. The Inhibitory Concentration (IC<sub>50</sub>) required to reduce number of bsf trypomastigotes by**  
 837 **50%. Pluronic were tested at 12 serial dilutions in triplicate and repeated in 3 separate experiments**  
 838 **(n=3) to produce IC<sub>50</sub> values.**

| w/v %            | F68         | F68/0.01% L61 | P85              | P105             |
|------------------|-------------|---------------|------------------|------------------|
| IC <sub>50</sub> | 0.48%       | 0.46%         | 0.00021%         | 0.00084%         |
| 95% CI           | 0.38 - 1.35 | 0.027 - 0.94  | 0.00056 - 0.0014 | 0.00070 - 0.0012 |

839

840

841 In further studies the anti-trypanosomal activity of combinations of F68 and pentamidine were  
 842 assessed (Table 9). The IC<sub>50</sub> (± 95% CI) values of pentamidine were 2.11 x 10<sup>-5</sup> ± (1.79 x 10<sup>-5</sup> – 2.50 x 10<sup>-5</sup>)  
 843 μM alone, 6.36 x 10<sup>-6</sup> (± 4.43 x 10<sup>-6</sup> – 9.12 x 10<sup>-6</sup>) μM with 0.01% F68 and 3.25 x 10<sup>-6</sup> ± (3.13 x 10<sup>-7</sup> –  
 844 3.38 x 10<sup>-5</sup>) μM with 0.001% F68.

845

846 **Table 9. The % of bsf trypomastigotes inhibited by pentamidine/pluronic combinations. The**  
 847 **combination formulation was tested in triplicate and repeated in 3 separate experiments (n=3).**

848

|                    | Pentamidine (μM) |       |          |                        |                        |                        |
|--------------------|------------------|-------|----------|------------------------|------------------------|------------------------|
|                    | 1                | 0.3   | 0.000152 | 5.1 x 10 <sup>-5</sup> | 1.7 x 10 <sup>-5</sup> | 5.7 x 10 <sup>-6</sup> |
| <b>F68 (w/v %)</b> |                  |       |          |                        |                        |                        |
| <b>0.5%</b>        | 99.5%            | 98.6% | 98.6%    | 98.3%                  | 98.3%                  | 99.2%                  |
| <b>0.1%</b>        | 98.5%            | 97.7% | 97.1%    | 97.1%                  | 97.3%                  | 97.7%                  |
| <b>0.025%</b>      | 98.3%            | 97.5% | 97.0%    | 96.9%                  | 97.0%                  | 90.6%                  |
| <b>0.01%</b>       | 98.4%            | 97.6% | 96.4%    | 95.1%                  | 82.8%                  | 3.4%                   |
| <b>0.001%</b>      | 98.3%            | 97.4% | 96.4%    | 91.9%                  | 73.1%                  | 1.8%                   |
| <b>0%</b>          | 98.3%            | 97.4% | 92.7%    | 65.3%                  | 35.0%                  | 4.1%                   |

849

850 To determine if the addition of Pluronic to pentamidine had an additive effect on the trypanocidal  
 851 activity of pentamidine, it was decided that work should focus on F68 rather than the other Pluronic,  
 852 as both P85 and P105 caused an inhibitory effect on insulin secretion. Although IC<sub>50</sub> values could only

853 be determined for two combinations, in part due to the high starting concentration of pentamidine  
854 used, a limited interaction between Pluronic F68 and pentamidine was observed at the lowest F68  
855 concentrations (Table 9 boxes shaded in red), suggesting that the addition of Pluronic had an additive  
856 effect on the trypanocidal activity.

857

### 858 **3.5 Blood-brain barrier: *In vitro* permeability assays**

859 We examined the ability of different pentamidine-Pluronic formulations to cross the BBB using the  
860 MDR1-MDCK cell line. Two analytical methods were applied: one detected pentamidine isethionate  
861 using UPLC-MS/MS (Table S5) and the other detected radiolabelled pentamidine using liquid  
862 scintillation counting (Table 10).

863 The ability of pentamidine isethionate to cross the MDR1-MDCK cell monolayers in the apical (luminal)  
864 to basolateral (abluminal) direction was limited as the concentration of pentamidine isethionate in the  
865 basolateral chamber were below the limits of UPLC-MS/MS detection, even when the pentamidine  
866 isethionate concentration was increased to 20  $\mu\text{M}$  (data not shown). The lower limit of quantification  
867 (LLQ) for UPLC-MS/MS method was  $\leq 7.8$  nM which is equivalent to  $<0.039\%$  of the dose in the donor  
868 (apical) chamber. These results would suggest that pentamidine is a 'CNS negative' drug. The mass  
869 balance (% recovery) results suggest that up to 25% may have been trapped either in the endothelial  
870 cells or by non-specific binding to the plastic plate or the polycarbonate membrane and this may  
871 contribute to the reduced recovery. It is important to note that the two amine groups of pentamidine  
872 are ionized at physiological pH (pKa is 11.4) and are likely to react with static charges on the surface of  
873 plastics. Interestingly the presence of Pluronic increased the mass balance results by 10-20%. In  
874 contrast the movement of pentamidine isethionate (20 $\mu\text{M}$ ) across the monolayer in the basal to apical  
875 direction was measurable, the calculated  $P_{\text{app}}$  being  $0.418 \times 10^{-6} \text{ cm s}^{-1}$ . Taken together with the  
876 absence of a detectable movement of pentamidine isethionate in the apical to basolateral direction  
877 these data would indicate the presence of an efflux mechanism for this molecule, likely MDR1. The

878 presence of Pluronics (F68, P105 or P85 at concentrations of 0.01%, 0.1% or 0.5%) did not affect the  
879 distribution of pentamidine isethionate across the monolayer in either direction.

880 MDR1-MDCK permeability assay experiments were also performed using radiolabelled pentamidine  
881 and liquid scintillation counting. The rate of transport of [<sup>3</sup>H(G)]pentamidine (9 nM) across MDR1-  
882 MDCK monolayer was examined and in contrast to the results achieved with the pentamidine  
883 isethionate was measurable in both directions (Table S5). In these experiments the highest  
884 concentrations of P85 (0.5%) and P105 (0.5%) affected the integrity of the cell monolayer and the  
885 P<sub>app</sub> for [<sup>14</sup>C(U)]sucrose was increased to 4.8 and 4.3 x 10<sup>-6</sup> cm/s respectively. The [<sup>14</sup>C(U)]sucrose P<sub>app</sub>  
886 for all other experiments was 1.61±0.15 x 10<sup>-6</sup> cm/s. The presence of the Pluronics (F68, P105 or P85)  
887 at concentrations of 0.01% and 0.1% did not significantly increase the distribution of  
888 [<sup>3</sup>H(G)]pentamidine across the MDR1-MDCK monolayer measured over 60 minutes confirming the  
889 results obtained using pentamidine isethionate and the UPLC-MS/MS detection method.

890 In conclusion, our target formulation characteristics of at least a 2-fold increase in pentamidine /  
891 pentamidine isethionate movement across the monolayer, compared with unformulated pentamidine,  
892 was not observed using these *in vitro* models of BBB permeability.

893 **Table 10. The Effect of P85, F68 and P105 on the Apparent Permeability of [<sup>3</sup>H(G)]pentamidine (9**  
894 **nM) MDR1-MDCK Cell Monolayers in the Apical to Basolateral Direction and the Basolateral to**  
895 **Apical Direction. The percentage recovery of pentamidine is also shown. All the data has been**  
896 **corrected for extracellular space by subtracting [<sup>14</sup>C(U)]sucrose (5.5 μM) P<sub>app</sub> values which ranged**  
897 **from 0.89 to 2.00 x 10<sup>-6</sup> cm/s. Each value represents three replicates for each n and n=3. n.d. = not**  
898 **determined as integrity of the barrier compromised.**

| [ <sup>3</sup> H(G)]Pentamidine<br>(9 nM) | Pluronic Concentration<br>(%) | P <sub>app</sub> A2B    | P <sub>app</sub> B2A    | A2B             | B2A             |
|-------------------------------------------|-------------------------------|-------------------------|-------------------------|-----------------|-----------------|
|                                           |                               | (10 <sup>-6</sup> cm/s) | (10 <sup>-6</sup> cm/s) | (%)             | (%)             |
|                                           |                               | Mean±SEM                | Mean±SEM                | Mass<br>balance | Mass<br>balance |
|                                           | 0                             | 0.678±0.025             | 0.776±0.062             | 84              | 85              |
|                                           | 0.01% P85                     | 0.310±0.142             | 0.431±0.161             | 86              | 87              |
|                                           | 0.1% P85                      | 0.561±0.0172            | 0.227±0.081             | 89              | 89              |



|  |            |              |             |    |    |
|--|------------|--------------|-------------|----|----|
|  | 0.5% P85   | n.d.         | n.d.        | 90 | 90 |
|  | 0.01% P105 | 0.577±0.0710 | 0.818±0.086 | 86 | 89 |
|  | 0.1% P105  | 0.898±0.161  | 0.776±0.054 | 89 | 88 |
|  | 0.5% P105  | n.d.         | n.d.        | 91 | 91 |
|  | 0.01% F68  | 0.200±0.115  | 0.106±0.061 | 95 | 83 |
|  | 0.1% F68   | 0.221±0.067  | 0.033±0.019 | 98 | 87 |
|  | 0.5% F68   | 0            | 0           | 98 | 84 |

899

### 900 **3.6: Blood-brain barrier *In situ* brain perfusion**

#### 901 **3.6a PLURONIC P85**

902 Co-formulation of 15.7 nM [<sup>3</sup>H(G)]pentamidine with Pluronic P85 did not significantly increase  
903 [<sup>3</sup>H(G)]pentamidine accumulation in any of the brain regions examined (Table S6).

904 In fact, overall there was a decrease in the [<sup>14</sup>C(U)]sucrose-corrected uptake of [<sup>3</sup>H(G)]pentamidine  
905 with P85 at 0.01% (p<0.001) and at 0.1% (p<0.01) (Two-Way ANOVA), but these decreases were not  
906 statistically significant when individual brain regions were examined using Bonferroni's pairwise  
907 comparisons.

908 Table S6 shows the results of capillary depletion analysis of the brain tissue after 10 minutes of  
909 perfusion in the presence or absence of the Pluronic, P85. [<sup>3</sup>H(G)]pentamidine accumulated in the  
910 capillary endothelial cells (pellet) of control mice while less than 2% of the plasma concentration  
911 crossed the basolateral membrane to reach the parenchyma (supernatant). These results are in good  
912 agreement with our previously published data[49]. There appeared to be an overall reduction in this  
913 accumulation of [<sup>3</sup>H(G)]pentamidine into the endothelial cells and consequently a reduction in the  
914 parenchyma when [<sup>3</sup>H(G)]pentamidine was co-formulated with 0.01% and 0.1% P85, but the reduction  
915 did not attain statistical significance (Two-Way ANOVA with Bonferroni's pairwise comparisons).

916 Whilst there appeared to be an overall inhibitory effect of Pluronic on the transport of  
917 [<sup>3</sup>H(G)]pentamidine across the BBB, there was a significant, 3-fold increase in the uptake of

918 [<sup>3</sup>H(G)]pentamidine into the pituitary gland after 10 minutes of perfusion with 0.1% and 0.5% P85  
919 (p<0.05 at both concentrations; Two-way ANOVA with Bonferroni's pairwise comparisons). This  
920 enhanced uptake of pentamidine appeared to be associated with an approximate 2-fold increase in  
921 accumulation of [<sup>14</sup>C(U)]sucrose from 20.5±3.9% ([<sup>14</sup>C(U)]sucrose alone) to 35.0±5.5% (+0.01%P85),  
922 43.0±4.0% (+0.1% P85) and 34.3±7.9% (+0.5% P85). A similar effect was observed in the choroid  
923 plexus sampled from a few individual mice that were perfused with pentamidine co-formulated with  
924 P85 at concentrations above the CMC. This resulted in a 2-fold increase in the mean uptake of  
925 [<sup>3</sup>H(G)]pentamidine which was not statistically significant. P85 did not affect accumulation of  
926 [<sup>3</sup>H(G)]pentamidine or [<sup>14</sup>C(U)]sucrose by the pineal gland.

### 927 **3.6b PLURONIC P105**

928 An overall decrease in the [<sup>14</sup>C(U)]sucrose-corrected uptake of [<sup>3</sup>H(G)]pentamidine into brain  
929 parenchyma was observed when 15.7nM [<sup>3</sup>H(G)]pentamidine was co-formulated with 0.1% (p<0.001)  
930 and 0.5% (p<0.001) P105, as shown in Table S7, but (like P85) these data did not reach statistical  
931 significance in any of the individual regions sampled (Two-Way ANOVA with Bonferroni's pairwise  
932 comparisons).

933 In contrast, there was a 33% increase in the [<sup>14</sup>C(U)]sucrose-corrected uptake of [<sup>3</sup>H(G)]pentamidine  
934 into the endothelial cell pellet when it was co-formulated with 0.1% P105 (p=0.027; Two- way ANOVA  
935 with Bonferroni's pairwise comparisons). This increase was apparent in only 3 out of 6 mice, and was  
936 associated with penetration of the brain tissue by the vascular space marker [<sup>14</sup>C(U)]sucrose, perhaps  
937 indicating an increase in the permeability of the apical/luminal endothelial cell membrane.

938 No significant differences were observed in the uptake of either the vascular space marker  
939 [<sup>14</sup>C(U)]sucrose or [<sup>3</sup>H(G)]pentamidine into the pineal gland, choroid plexus or pituitary gland after 10  
940 minutes of perfusion with [<sup>3</sup>H(G)]pentamidine co-formulated with P105 as shown in Table S7 (p>0.05

941 for each Pluronic concentration and circumventricular organ; Two-way ANOVA with Bonferroni's  
942 pairwise comparisons).

### 943 **3.6c PLURONIC F68**

#### 944 **10 minute perfusions**

945 Co-formulation of [ $^3\text{H}(\text{G})$ ]pentamidine with F68 resulted in an overall decrease in accumulation of  
946 [ $^3\text{H}(\text{G})$ ]pentamidine into brain parenchyma after 10 minutes of perfusion ( $p=0.002$  for 0.1% and  $p=0.03$   
947 for 0.5% respectively; Two-way ANOVA with Bonferroni's pairwise comparisons) (Table S8). A  
948 decrease in vascular space as measured by accumulation of [ $^{14}\text{C}(\text{U})$ ]sucrose was also measured when  
949 0.01 or 0.1% F68 (but not 0.5%) was present in the artificial plasma ( $p=0.042$  for 0.01% and  $p=0.004$   
950 for 0.1% respectively; Two-way ANOVA with Bonferroni's pairwise comparisons) (Table S9).

951 F68 did appear to increase accumulation of [ $^3\text{H}(\text{G})$ ]pentamidine into the endothelial cell pellet at  
952 concentrations of 0.01% and 0.1%, but these results did not attain significance. This increase in  
953 [ $^3\text{H}(\text{G})$ ]pentamidine, did not appear to be associated with a concomitant increase in uptake of  
954 [ $^{14}\text{C}(\text{U})$ ]sucrose ( $p>0.05$ ) and might have been due, at least in part, to a small decrease in the amount  
955 of drug crossing the basolateral membrane to enter the brain parenchyma, as indicated by a marginal  
956 reduction of [ $^3\text{H}(\text{G})$ ]pentamidine in the supernatant (Table S8).

957 Co-formulation of [ $^3\text{H}(\text{G})$ ]pentamidine with 0.5% F68 resulted in a 2-fold increase in uptake into the  
958 pituitary gland after 10 minutes of perfusion ( $p=0.017$ ; 1-way ANOVA with Bonferroni's pairwise  
959 comparisons). A similar, but not statistically significant increase was observed in uptake of  
960 [ $^{14}\text{C}(\text{U})$ ]sucrose into this organ over the same time period.

#### 961 **30 minute perfusion**

962 Accumulation of [ $^{14}\text{C}(\text{U})$ ]sucrose measured in brain parenchyma, as a percentage of concentration in  
963 the artificial plasma ( $R_{\text{TISSUE/PLASMA}}\%$ ), ranged from 1.3% in the hippocampus to 4.3% in the pons after 30

964 minutes of perfusion. These values are almost identical to our previously published data for BALB/c  
965 male mice (1.6 and 4.5% respectively)[7]. Accumulation of [<sup>3</sup>H(G)]pentamidine, when corrected for  
966 vascular space ranged from 6.9% in the hippocampus to 15% and 10.9% in the more highly  
967 vascularized regions of the hypothalamus and pons respectively. These values were slightly higher  
968 than our previously published data (4.3% for hippocampus, 7.6% for hypothalamus and 8.2% for pons)  
969 and might reflect changes in expression of transporters due to differences in environment/diet or  
970 selective pressures during breeding.

971 Formulation of 15 nM [<sup>3</sup>H(G)]pentamidine with 0.01% or 0.1% F68 did not affect [<sup>14</sup>C(U)]sucrose brain  
972 space (p=0.139 and 0.460 respectively; 2-way ANOVA with Bonferroni's post-tests). No significant  
973 differences were observed in [<sup>3</sup>H(G)]pentamidine accumulation at these concentrations (p=0.120 and  
974 1.000 respectively; 2-way ANOVA with Bonferroni's post-tests). Similarly, F68 had no significant effect  
975 on [<sup>14</sup>C(U)]sucrose or [<sup>3</sup>H(G)]pentamidine accumulation in the capillary depletion samples after 30  
976 minutes of perfusion (p>0.05 for each concentration tested for each isotope; 2-Way ANOVA) nor in  
977 the circumventricular organs (p>0.05 for each concentration tested for each isotope; 2-Way ANOVA).

978 There was an approximate 2-fold increase in accumulation of both [<sup>3</sup>H(G)]pentamidine and the  
979 vascular space marker [<sup>14</sup>C(U)]sucrose in the brain parenchyma of mice that were perfused with  
980 formulations containing 0.5% F68, (p=0.003 and p <0. 001 respectively; 2-way ANOVA with  
981 Bonferroni's post-tests), as shown in Table S10A and S10B. Visible signs of damage to the BBB  
982 including permeation and staining with Evans blue (MW 961), were also observed in some mice. The  
983 results from the capillary depletion analysis after 30 minutes of perfusion would also appear to reflect  
984 damage to both the apical and basolateral endothelial cell membranes, with a tendency for increased  
985 permeation of [<sup>14</sup>C(U)]sucrose into the brain parenchyma, as demonstrated by a small, though not  
986 statistically significant rise in this isotope being detected in the supernatant (Table S10).

987 Co-formulation of [<sup>3</sup>H(G)]pentamidine and [<sup>14</sup>C(U)]sucrose with 0.5% F68 resulted in an increase into  
988 the pituitary gland and the choroid plexus when the perfusion time was extended to 30 minutes,  
989 although these results were not statistically significant.

### 990 **3.7 *In vivo* pharmacokinetic experiments with pentamidine isethionate or [<sup>3</sup>H(G)]pentamidine.**

991 F68 at the 0.025% does not change the accumulation of pentamidine isethionate in the plasma, brain  
992 parenchyma or blood in the mouse up to 10 hours post-dosing (Fig 4). There might be a late-onset  
993 increase in brain concentrations in the pentamidine alone group, but as the standard deviations for  
994 this group at this time-point are large this is unlikely to be significant.

995 **Fig 4. The effect of Pluronic F68 on pentamidine concentrations in mouse plasma, blood and brain**  
996 **after an intravenous dose.** Each point represents an n of 3. 4mg/kg pentamidine ± 0.025% F68 i.v.  
997 Values ± SD.

998  
999 Table 11 shows the mean plasma and CSF (corrected for blood/sucrose contamination) concentrations  
1000 for [<sup>3</sup>H(G)]pentamidine and/or its metabolites, measured at 2 hours after intra-venous injection. No  
1001 significant differences were observed when [<sup>3</sup>H(G)]pentamidine was co-formulated with either 0.025%  
1002 or 0.5% F68 (p >0.05 for plasma and CSF; One-way ANOVA). Similarly, no significant differences were  
1003 observed in uptake of [<sup>3</sup>H(G)]pentamidine or the vascular space marker [<sup>14</sup>C(U)]sucrose, into the brain  
1004 parenchyma, capillary depletion samples or the circumventricular organs when [<sup>3</sup>H(G)]pentamidine  
1005 was injected in the presence or absence of F68 (p>0.05; 2-way ANOVA with Bonferroni's pairwise  
1006 comparisons) as shown in Table 12.

1007 **Table 11. Concentration of [<sup>3</sup>H(G)]pentamidine/metabolites in the plasma and**  
1008 **CSF at 2 hours post-injection.**

| Group      | mean concentration in plasma<br>ng/ml (± SEM) | mean concentration in CSF<br>pg/ml (± SEM) |
|------------|-----------------------------------------------|--------------------------------------------|
| control    | 0.343 (± 0.061)                               | 2.669 (± 0.765)                            |
| 0.025% F68 | 0.345 (± 0.013)                               | 1.948 (± 0.826)                            |
| 0.5% F68   | 0.356 (± 0.026)                               | 3.592 (± 1.932)                            |

1010

1011 **Table 12. Uptake of [<sup>3</sup>H(G)]pentamidine into brain tissue (corrected for vascular space) at 2 hours**  
 1012 **post-injection. Data is presented as the tissue/plasma ratio (a) and converted into concentrations in**  
 1013 **ng/g of tissue (b). A limitation of measuring pentamidine by scintillation counting is that any**  
 1014 **metabolites produced during the 2 hours that have retained the radiolabel, will be counted as**  
 1015 **[<sup>3</sup>H(G)]pentamidine. These metabolites may have different transport characteristics and may or may**  
 1016 **not be active against trypanosomes.**

| <b>(a)</b>             | <b>R<sub>TISSUE/PLASMA</sub>% (mean±SEM)</b>           |                                                             |                                                           |
|------------------------|--------------------------------------------------------|-------------------------------------------------------------|-----------------------------------------------------------|
| <b>Region</b>          | <b>Control<br/>(15.7 nM<br/>pentamidine)<br/>(n=6)</b> | <b>0.025% F68 +<br/>(15.7 nM<br/>pentamidine)<br/>(n=6)</b> | <b>0.5% F68 +<br/>(15.7 nM<br/>pentamidine)<br/>(n=5)</b> |
| <b>Right brain</b>     | 115.52 (± 12.46)                                       | 120.29 (± 17.14)                                            | 87.36 (± 20.36)                                           |
| <b>Left brain</b>      | 152.29 (± 33.48)                                       | 111.85 (± 19.15)                                            | 106.10 (± 12.92)                                          |
| <b>Cerebellum</b>      | 204.02 (± 35.28)                                       | 208.87 (± 28.81)                                            | 172.48 (± 30.34)                                          |
| <b>Midbrain</b>        | 181.18 (± 45.30)                                       | 254.02 (± 35.48)                                            | 180.00 (± 32.83)                                          |
| <b>Homogenate</b>      | 249.41 (± 35.59)                                       | 184.18 (± 35.22)                                            | 293.81 (± 122.95)                                         |
| <b>Supernatant</b>     | 123.35 (± 28.45)                                       | 99.72 (± 9.02)                                              | 98.66 (± 9.47)                                            |
| <b>Pellet</b>          | 479.72 (± 72.50)                                       | 310.63 (± 38.62)                                            | 536.52 (± 212.72)                                         |
| <b>Choroid plexus</b>  | 24666.66 (± 4928)                                      | 19628.89 (± 4672)                                           | 20463.70 (± 1827)                                         |
| <b>Pituitary gland</b> | 15053.41 (± 3598)                                      | 11285.42 (± 2008)                                           | 15061.87 (± 5321)                                         |

1017

| <b>(b)</b>             | <b>Mean concentration<br/>(ng/g or ng/ml for the supernatant ±SEM)</b> |                                                           |                                                           |
|------------------------|------------------------------------------------------------------------|-----------------------------------------------------------|-----------------------------------------------------------|
| <b>Region</b>          | <b>Control<br/>(15.7 nM<br/>pentamidine)<br/>(n=6)</b>                 | <b>0.025% F68<br/>(15.7 nM<br/>pentamidine)<br/>(n=6)</b> | <b>0.5% F68 +<br/>(15.7 nM<br/>pentamidine)<br/>(n=5)</b> |
| <b>Right brain</b>     | 0.363 (± 0.035)                                                        | 0.417 (± 0.061)                                           | 0.302 (± 0.058)                                           |
| <b>Left brain</b>      | 0.472 (± 0.084)                                                        | 0.383 (± 0.063)                                           | 0.375 (± 0.048)                                           |
| <b>Cerebellum</b>      | 0.607 (± 0.032)                                                        | 0.719 (± 0.097)                                           | 0.591 (± 0.084)                                           |
| <b>Midbrain</b>        | 0.494 (± 0.075)                                                        | 0.866 (± 0.115)                                           | 0.614 (± 0.072)                                           |
| <b>Homogenate</b>      | 0.820 (± 0.183)                                                        | 0.643 (± 0.132)                                           | 0.988 (± 0.375)                                           |
| <b>Supernatant</b>     | 0.363 (± 0.037)                                                        | 0.345 (± 0.035)                                           | 0.351 (± 0.043)                                           |
| <b>Pellet</b>          | 1.482 (± 0.151)                                                        | 1.067 (± 0.125)                                           | 1.827 (± 0.662)                                           |
| <b>Choroid plexus</b>  | 74.68 (± 11.48)                                                        | 84.04 (± 5.78)                                            | 72.20 (± 7.60)                                            |
| <b>Pituitary gland</b> | 43.76 (± 3.82)                                                         | 37.58 (± 6.54)                                            | 68.13 (± 15.05)                                           |

1018

## 1019 Discussion

1020 In this study we generated pentamidine/Pluronic® formulations and prioritised 18 formulations using  
1021 a rational, iterative approach (Fig 1). The milestones were intended to ensure that the most  
1022 appropriate formulations, on the basis of *in silico* and *in vitro* data, were taken forward to the *in vivo*  
1023 pharmacokinetic studies and that the formulations with the greatest likelihood of success would be  
1024 assessed for toxicity issues *in vivo* and tested in animal efficacy models of stage 1 and stage 2 HAT. An  
1025 ideal formulation for injection should be equipped with characteristics that improved the stability and  
1026 safety profile of pentamidine, enhanced therapeutic effect, and accelerated the absorbance of drugs.

1027 Since increasing the concentration of pentamidine in the brain may cause an intractable neurotoxicity  
1028 and serious adverse events our starting point was a customised, wide ligand profiling screen carried  
1029 out against 40 CNS targets (Tables 2 and S1). Five targets (imidazoline I<sub>2</sub> receptor; monoamine oxidase  
1030 A and B; adrenergic α<sub>1</sub> receptor; muscarinic receptor) were identified to have significant affinity for  
1031 pentamidine (Table 3). All but one of these (imidazoline I<sub>2</sub> receptor) had a 20-1000 fold lower affinity  
1032 than the relative trypanocidal activity and did not generate major concern[59]. The activity against  
1033 the imidazoline I<sub>2</sub> receptor may explain the cardiovascular adverse events with this drug. We were  
1034 unable to reproduce the result of De Boer et al., 2010[55] in a recombinant human system indicating  
1035 that pentamidine was without effect (at up to 10 μM) on the hKir2.1 potassium channel-induced  
1036 inward rectifying current (Tables 2 and S2). Thus progression could continue through the screening  
1037 cascade.

1038 For the Pluronics tested in this study (P85, P105, F68 and L61), phase behaviour [69][33] and cloud  
1039 points [70] are well established. P85, P105 and F68 are soluble in water and saline solutions at both  
1040 24°C and 37°C. L61 has a very low cloud point at 24°C. Pure L61 therefore has limitations as a  
1041 formulation for drug delivery. Our phase diagrams revealed that F68, which is highly hydrated, is  
1042 unable to improve the solubility of highly hydrophobic L61 to a great extent, so it was not possible to  
1043 pursue a 1:1 mixture of L61:F68 in the assays (Table S3 and S4).



1044

1045 Using molecular dynamics (MD) simulations and physical techniques, we elucidated the structural  
1046 properties of Pluronic P85, P105, F68 and L61 micelles, and were able to extract fundamental  
1047 parameters required for biological evaluation of the formulations. For example, the CMC were  
1048 measured for F68, P85 and P105 at 20°C and 37°C both in aqueous as well as saline (0.9 wt%)  
1049 solutions. Several values for the CMC of Pluronic can be found in the literature [71][72][73][11][74].  
1050 These values tend to vary widely, showing as much as one order of magnitude differences for the  
1051 same Pluronic[75]. This has been attributed to several reasons: difference in molecular weight  
1052 distribution between batches [76][74], presence of impurities such as diblocks[76][77] and differences  
1053 inherent to the technique employed[78]. In addition, for some Pluronic systems, two critical  
1054 concentrations are detected, both in surface tension and spectroscopic experiments [76][72]. This  
1055 behaviour has been ascribed to formation of pre-micellar aggregates occurring before full micelle  
1056 formation[79][80][71][72][81]. In this work, which used the intensity of pyrene fluorescence emission,  
1057 two critical concentrations were also detected (Fig S2). The CMC values presented here (Table 4) are  
1058 taken from the first break point. The CMC values achieved for F68, P85 and P106 were fairly similar  
1059 and did not allow a prioritisation of a specific formulation based on CMC alone. The concentrations of  
1060 Pluronic (0.001 to 0.025%) used in the biological assays were based on the CMC values and were  
1061 selected on the basis that they would be likely to consist of mainly unimers (0.001-0.025%); a mixture  
1062 of unimers and micelles (0.1%) and mostly micelles (0.5%) respectively.

1063

1064 F68 micelles have a relatively small radius of 52.0 Å (Table 7). This attribute will increase stability, half-  
1065 life and therefore circulation time of this Pluronic, since small micelles evade detection and  
1066 destruction by the reticuloendothelial system. However, this small volume may also correlate to low  
1067 drug loading (Table 5; Fig S3). In addition, the fact that pentamidine release from both F68 and P105  
1068 micelles is by diffusion would indicate that these Pluronic are unlikely to significantly prolong the  
1069 circulation time of pentamidine (Fig S4).

1070

1071 Haemolysis of human red blood cells was not observed in the presence of 0.5%, 0.1%, 0.025%, 0.01%,  
1072 and 0.001% P85, P105 or F68, the results being comparable to the negative control (0.05% DMSO).  
1073 This suggests that an intravenous formulation containing P85, P105, or F68 would not lead to  
1074 haemolysis at the tested concentrations, supporting the safety profile of Pluronic polymers for medical  
1075 use[15][82]. In agreement, no differences were reported in the terminal haematological values  
1076 (including haemoglobin, packed cell volume, number of erythrocytes, total number of leukocytes) and  
1077 blood-chemical values (including urea, total protein, alkaline phosphatase) obtained from rats who  
1078 had received once daily intravenous doses of F68 (doses ranging from 10-1000 mg/kg body weight) or  
1079 from rats who had been administered physiological saline for one month [83]. No morphological  
1080 abnormalities were detected in the rats which received the 0-50 mg/kg daily dose of F68, however,  
1081 rats which received the higher doses had detectable alterations i.e. the presence of foam cells in the  
1082 lungs (dose was 500-1000 mg/kg) and focal cortical degenerative changes in the kidneys (dose was  
1083 100-1000 mg/kg).

1084 Pentamidine caused a concentration-dependent inhibition of insulin secretion from MIN6  $\beta$ -cells  
1085 suggesting that this is one mechanism through which it could induce diabetes[9]. Pentamidine is  
1086 known to be an agonist at imidazoline receptors [84], but it is unlikely that this explains its inhibitory  
1087 effects on insulin secretion since  $\beta$ -cell imidazoline receptors are coupled to increased insulin  
1088 release[85]. However, the imidazoline ligand idazoxan is reported to cause a concentration-  
1089 dependent inhibition of  $\beta$ -cell viability[86], similar to the effects observed here with pentamidine, so it  
1090 is possible that the reduction in insulin secretion is secondary to pentamidine-mediated activation of  
1091  $\beta$ -cell imidazoline receptors and impairment of cell viability. Pentamidine-induced diabetes is not  
1092 thought to be reversible [9], and so testing for a marker of pancreatic off target adverse effects  
1093 occurred early in the screening cascade. Importantly, a number of Pluronic formulations (P85, P105)  
1094 were shown to increase the peripheral toxicity of pentamidine as measured by decreases in insulin  
1095 secretion. In a human tissue cell model (HEK-293), P105 has previously been shown to cause dose

1096 dependent changes in cell viability[16]. However, a lead Pluronic (F68) was identified which  
1097 demonstrated equivalent toxicity to unformulated pentamidine, on  $\beta$ -cell viability and insulin  
1098 secretion. Supporting this formulation selection our studies also revealed that P85 and P105 at 0.01%  
1099 and 0.5% concentrations caused loss of MDCK-MDR monolayer integrity, whereas F68 at  
1100 concentrations up to 0.5% had no effect (Fig S7). A correlation between HLB and cytotoxicity has  
1101 previously been observed with low cytotoxicity being guaranteed when the HLB of the polymer is  $\geq 10$   
1102 (Table S1)[28].

1103 Importantly, all formulations tested did not prevent pentamidine killing *Trypanosoma brucei* blood  
1104 stream form trypomastigotes. In fact, pure P85 and P105 were highly trypanocidal and F68-  
1105 pentamidine formulations had a slight synergistic effect.

1106 *In vitro* BBB studies indicated that there was an efflux process for pentamidine as also demonstrated  
1107 in P-gp knockout mice studies [7]. However, we were unable to demonstrate an increase in  
1108 pentamidine movement across the barrier in either direction, compared with unformulated  
1109 pentamidine in any of our *in vitro* systems.

1110 Further studies utilizing the *in situ* brain perfusion technique confirmed that the Pluronics (P85, P105  
1111 or F68) did not increase pentamidine delivery to the brain, including the choroid plexus, after either 10  
1112 or 30 minutes exposure. Our studies using *in situ* brain perfusions over 10 minutes in mice have  
1113 shown that the P85, P105 and F68 formulations have a tendency to actually prevent uptake of  
1114 pentamidine into brain tissue and/or vascular endothelial cells, which constitute an intact BBB. This  
1115 may be related to interactions of the Pluronics with influx transporters for pentamidine (e.g. OCT1),  
1116 although our *in vitro* BBB studies did not indicate that the pentamidine permeability was affected by  
1117 the presence of F68, P85 and P105 (0.01% and 0.1%) in either direction. Importantly, a similar P85  
1118 induced reduction in BBB permeability was observed by other workers, [87] who noted a reduction in  
1119 the rate of uptake into brain tissue of P85-leptin conjugates during the first 90 minutes after iv  
1120 injection compared with native leptin. Despite this initial inhibition of P85-leptin influx, a greater

1121 overall concentration of the conjugate was measured in brain tissue after 4 hours, an observation that  
1122 the authors ascribed to improved pharmacokinetic properties. Digoxin delivery to the brain has  
1123 previously been determined 1 - 10 hr post-injection in mice and found to be significantly enhanced  
1124 when Pluronic 85 is present [88].

1125 Sucrose does not cross phospholipid membranes and was used in the brain perfusion experiments as a  
1126 vascular space marker. An increase in [<sup>14</sup>C(U)]sucrose would indicate that the integrity of the  
1127 membrane or the tight junctions between cells had been compromised. Conversely, a decrease would  
1128 suggest that the proportionate volume of tissue occupied by blood vessels had been reduced. It is  
1129 therefore interesting that F68 has previously been shown to interact with the mechanisms that control  
1130 vasoconstriction and vasodilation[89][90] and could lead to the observed reduction in vascular space.

1131

1132 Interestingly, the *in vivo* mouse pharmacokinetic study revealed that the concentrations of  
1133 pentamidine in brain parenchyma in this species seem high compared with data from human (using  
1134 CSF rather than brain parenchyma) which indicated that less than 1% of the plasma pentamidine  
1135 concentration is detected in CSF[91]. Furthermore, assessment of this lead formulation in an *in vivo*  
1136 pharmacokinetic study confirmed that F68 did not increase pentamidine delivery to the brain under  
1137 the conditions studied. This is not linked to partitioning of pentamidine inside the micelles as this is  
1138 low, hence the use of Pluronic micelles to protect this drug after administration and extend its  
1139 circulation time is probably limited. Although it may be related to the fact that F68 is hydrophilic and  
1140 prefers to remain in the plasma than be distributed to organs [17].

1141

1142 Whilst there are limitations to all assay systems, the package of data generated by the team provided  
1143 a compelling and robust data set. The screening cascade has successfully identified Pluronic-  
1144 pentamidine formulations that harbour trypanocidal activity and do not increase the safety concerns  
1145 centrally or peripherally (over unformulated pentamidine). However, the data suggested that we

1146 would not be able to significantly enhance brain exposure of pentamidine using the Pluronic (F68 , P85  
1147 or P105) within a reasonable time frame and existing budget. We therefore drew the study to a close  
1148 at milestone 2 (Fig 1). Importantly a significant body of high-quality data has been generated as part  
1149 of this project which may be highly relevant to other teams looking to understand block-copolymer  
1150 architecture, further develop block-copolymers as nanocarriers, improve BBB penetration of drugs or  
1151 to those looking to understand toxicity of pentamidine.

1152

1153

## 1154 **Acknowledgements**

1155 This research was funded by a Medical Research Council (MRC) DPFS award (MR/K015451/1) to Dr S.A.  
1156 Thomas (PI), Dr C.A. Dreiss, Dr C. Lorenz, Professor S. Persaud, Dr M. Christie (all at King's College  
1157 London), Dr V. Yardley and Professor S. Croft (both at LSHTM). This award was jointly funded by the  
1158 UK MRC and the UK Department for International Development (DFID) under the MRC/DFID  
1159 Concordat agreement and is also part of the EDCTP2 programme supported by the European Union.  
1160 This research was also supported by the MRC (PhD studentship MR/K500811/1) and a multi-user  
1161 equipment grant from the Wellcome Trust which provided a Perkin-Elmer Tricarb 2900TR liquid  
1162 scintillation counter (080268). The BBSRC Centre of Integrative Biomedicine provided funding for the  
1163 haemolysis assay.

1164 We are grateful for the project management support of Dr Gayle Chapman (Biomedical Catalyst Ltd),  
1165 UK. We would like to acknowledge the support of Dr Surbi Gupta (King's IP & Licensing team) who was  
1166 involved in the IP assessment of the project.

1167

1168 We would like to acknowledge the support of Drugs for Neglected Diseases initiative (DNDi) a  
1169 collaborative, patients' needs-driven, non-profit drug research and development organization that is  
1170 developing new treatments for Neglected Diseases.

1171 We would like to thank Miss Raha Ahmadkhanbeigi (King's College London) for help with the  
1172 haemolysis assay. We would like to thank Ms Ana-Charlott Berglar (King's College London) for help  
1173 with acquisition of the preliminary data. We would like to thank ISIS, Rutherford-Appleton Laboratory  
1174 (Science and Technology Facilities Council, Didcot, Oxford) for the award of neutron beam time on the  
1175 LOQ instrument to perform the SANS experiments.

1176 **References**

- 1177 1. Simarro PP, Diarra A, Postigo JAR, Franco JR, Jannin JG. The human african trypanosomiasis control and surveillance programme of the world health  
1178 organization 2000-2009: The way forward. *PLoS Negl Trop Dis.* 2011;5.
- 1179 2. WHO. No Title. In: [http://www.who.int/trypanosomiasis\\_african/country/en/](http://www.who.int/trypanosomiasis_african/country/en/). 2014.
- 1180 3. Franco JR, Simarro PP, Diarra A, Jannin JG. Epidemiology of human African trypanosomiasis. *Clin Epidemiol.* 2014;6: 257–75.  
1181 doi:10.2147/CLEP.S39728
- 1182 4. Sanderson L, Dogruel M, Rodgers J, Bradley B, Thomas SA. The blood-brain barrier significantly limits eflornithine entry into *Trypanosoma brucei*  
1183 *brucei* infected mouse brain. *J Neurochem.* 2008;107: 1136–1146.
- 1184 5. Jeganathan S, Sanderson L, Dogruel M, Rodgers J, Croft S, Thomas SA. The distribution of nifurtimox across the healthy and trypanosome-infected  
1185 murine blood-brain and blood-cerebrospinal fluid barriers. *J Pharmacol Exp Ther.* 2011;336: 506–515.
- 1186 6. Sanderson L, Khan A, Thomas S. Distribution of suramin, an antitrypanosomal drug, across the blood-brain and blood-cerebrospinal fluid interfaces  
1187 in wild-type and P-glycoprotein transporter-deficient mice. *Antimicrob Agents Chemother.* 2007;51: 3136–3146.
- 1188 7. Sanderson L, Dogruel M, Rodgers J, Koning HP De, Thomas SA. Pentamidine movement across the murine blood-brain and blood-cerebrospinal fluid  
1189 barriers: Effect of trypanosome infection, combination therapy, P-glycoprotein, and multidrug resistance-associated protein. *J Pharmacol Exp Ther.*  
1190 2009;329: 967–971.
- 1191 8. Doua F, Miezán TW, Singaro JRS, Yapo FB, Baltz T. The efficacy of pentamidine in the treatment of early-late stage *Trypanosoma brucei gambiense*  
1192 trypanosomiasis. *Am J Trop Med Hyg.* 1996;55: 586–588.
- 1193 9. Burri C. Chemotherapy against human African trypanosomiasis: is there a road to success? *Parasitology.* 2010;137: 1987–94.  
1194 doi:10.1017/S0031182010001137
- 1195 10. Batrakova E V, Li S, Li Y, Alakhov VY, Elmquist WF, Kabanov A V. Distribution kinetics of a micelle-forming block copolymer Pluronic P85. *J Control*  
1196 *Release.* 2004;100: 389–97. doi:10.1016/j.jconrel.2004.09.002
- 1197 11. Kozlov MY, Melik-Nubarov NS, Batrakova E V., Kabanov A V. Relationship between Pluronic Block Copolymer Structure, Critical Micellization  
1198 Concentration and Partitioning Coefficients of Low Molecular Mass Solutes. *Macromolecules.* American Chemical Society; 2000;33: 3305–3313.  
1199 doi:10.1021/ma991634x
- 1200 12. Cagel M, Tesan FC, Bernabeu E, Salgueiro MJ, Zubillaga MB, Moretton MA, et al. Polymeric mixed micelles as nanomedicines: Achievements and  
1201 perspectives. *Eur J Pharm Biopharm.* 2017;113: 211–228. doi:10.1016/j.ejpb.2016.12.019



- 1202 13. Oh KT, Bronich TK, Kabanov A V. Micellar formulations for drug delivery based on mixtures of hydrophobic and hydrophilic Pluronic® block  
1203 copolymers. *J Control Release*. 2004;94: 411–422. doi:10.1016/j.jconrel.2003.10.018
- 1204 14. Chiappetta D.A. and Sosnik A. Poly(ethylene oxide)–poly(propylene oxide) block copolymer micelles as drug delivery agents: Improved  
1205 hydrosolubility, stability and bioavailability of drugs. *Eur J Pharm Biopharm*. 2007;66: 303.
- 1206 15. Singh-Joy SD, McLain VC. Safety assessment of poloxamers 101, 105, 108, 122, 123, 124, 181, 182, 183, 184, 185, 188, 212, 215, 217, 231, 234, 235,  
1207 237, 238, 282, 284, 288, 331, 333, 334, 335, 338, 401, 402, 403, and 407, poloxamer 105 benzoate, and poloxamer 182 dibenzoate as use. *Int J*  
1208 *Toxicol*. 2008;27 Suppl 2: 93–128. doi:10.1080/10915810802244595
- 1209 16. Fang X, Chen, Sha X, Zhang, Zhong, Fan, et al. Pluronic mixed micelles overcoming methotrexate multidrug resistance: in vitro and in vivo evaluation.  
1210 *Int J Nanomedicine*. 2013; 1463. doi:10.2147/IJN.S42368
- 1211 17. Alakhov VY, Kabanov A V. Block copolymeric biotransport carriers as versatile vehicles for drug delivery. *Expert Opin Investig Drugs*. 1998;7: 1453–  
1212 1473. doi:10.1517/13543784.7.9.1453
- 1213 18. Shaik N, Pan G, Elmquist WF. Interactions of pluronic block copolymers on P-gp efflux activity: Experience with HIV-1 protease inhibitors. *J Pharm Sci*.  
1214 2008;97: 5421–5433. doi:10.1002/jps.21372
- 1215 19. Batrakova E V., Han H-Y, Alakhov VY, Miller DW, Kabanov A V. Effects of Pluronic Block Copolymers on Drug Absorption in Caco-2 Cell Monolayers.  
1216 *Pharm Res*. Kluwer Academic Publishers-Plenum Publishers; 1998;15: 850–855. doi:10.1023/A:1011964213024
- 1217 20. Batrakova E, Lee S, Li S, Venne A, Alakhov V, Kabanov A. Fundamental Relationships Between the Composition of Pluronic Block Copolymers and  
1218 Their Hypersensitization Effect in MDR Cancer Cells. *Pharm Res*. 1999;16: 1373–1379. doi:10.1023/A:1018942823676
- 1219 21. Shaik N, Giri N, Elmquist WF. Investigation of the micellar effect of pluronic P85 on P-glycoprotein inhibition: cell accumulation and equilibrium  
1220 dialysis studies. *J Pharm Sci*. 2009;98: 4170–90. doi:10.1002/jps.21723
- 1221 22. Miller DW, Batrakova E V., Kabanov A V. Inhibition of Multidrug Resistance-Associated Protein (MRP) Functional Activity with Pluronic Block  
1222 Copolymers. *Pharm Res*. Kluwer Academic Publishers-Plenum Publishers; 1999;16: 396–401. doi:10.1023/A:1018873702411
- 1223 23. Rapoport N, Marin AP, Timoshin AA. Effect of a Polymeric Surfactant on Electron Transport in HL-60 Cells. *Arch Biochem Biophys*. 2000;384: 100–  
1224 108. doi:10.1006/abbi.2000.2104
- 1225 24. Batrakova E V. Optimal Structure Requirements for Pluronic Block Copolymers in Modifying P-glycoprotein Drug Efflux Transporter Activity in Bovine  
1226 Brain Microvessel Endothelial Cells. *J Pharmacol Exp Ther*. 2003;304: 845–854. doi:10.1124/jpet.102.043307

- 1227 25. Wang Y, Hao J, Li Y, Zhang Z, Sha X, Han L, et al. Poly(caprolactone)-modified Pluronic P105 micelles for reversal of paclitaxel-resistance in SKOV-3  
1228 tumors. *Biomaterials*. 2012;33: 4741–51. doi:10.1016/j.biomaterials.2012.03.013
- 1229 26. Venne A, Li S, Mandeville R, Kabanov A, Alakhov V. Hypersensitizing effect of pluronic L61 on cytotoxic activity, transport, and subcellular  
1230 distribution of doxorubicin in multiple drug-resistant cells. *Cancer Res*. 1996;56: 3626–3629.
- 1231 27. Huang J, Si L, Jiang L, Fan Z, Qiu J, Li G. Effect of pluronic F68 block copolymer on P-glycoprotein transport and CYP3A4 metabolism. *Int J Pharm*.  
1232 2008;356: 351–3. doi:10.1016/j.ijpharm.2007.12.028
- 1233 28. Budkina OA, Demina T V., Dorodnykh TY, Melik-Nubarov NS, Grozdova ID. Cytotoxicity of nonionic amphiphilic copolymers. *Polym Sci Ser A*. 2012;54:  
1234 707–717. doi:10.1134/S0965545X12080020
- 1235 29. Valle JW, Armstrong A, Newman C, Alakhov V, Pietrzynski G, Brewer J, et al. A phase 2 study of SP1049C, doxorubicin in P-glycoprotein-targeting  
1236 pluronics, in patients with advanced adenocarcinoma of the esophagus and gastroesophageal junction. *Invest New Drugs*. 2011;29: 1029–1037.
- 1237 30. Alakhova DY, Zhao Y, Li S, Kabanov A V. Effect of Doxorubicin/Pluronic SP1049C on Tumorigenicity, Aggressiveness, DNA Methylation and Stem Cell  
1238 Markers in Murine Leukemia. *PLoS One*. 2013;8. doi:10.1371/journal.pone.0072238
- 1239 31. Mendonça DVC, Lage LMR, Lage DP, Chávez-Fumagalli MA, Ludolf F, Roatt BM, et al. Poloxamer 407 (Pluronic® F127)-based polymeric micelles for  
1240 amphotericin B: In vitro biological activity, toxicity and in vivo therapeutic efficacy against murine tegumentary leishmaniasis. *Exp Parasitol*.  
1241 2016;169: 34–42. doi:10.1016/j.exppara.2016.07.005
- 1242 32. Alakhova DY, Kabanov A V. Pluronic and MDR reversal: an update. *Mol Pharm*. 2014;11: 2566–78. doi:10.1021/mp500298q
- 1243 33. Zhang K, Khan A. Phase Behavior of Poly(ethylene oxide)-Poly(propylene oxide)-Poly(ethylene oxide) Triblock Copolymers in Water. *Macromolecules*.  
1244 1995;28: 3807–3812. doi:10.1021/ma00115a009
- 1245 34. World Health Organization. Stability testing of active pharmaceutical ingredients and finished pharmaceutical products. WHO Tech Rep Ser.  
1246 2009;953: 87–130. Available: [http://www.ich.org/fileadmin/Public\\_Web\\_Site/ICH\\_Products/Guidelines/Quality/Q1F/Stability\\_Guideline\\_WHO.pdf](http://www.ich.org/fileadmin/Public_Web_Site/ICH_Products/Guidelines/Quality/Q1F/Stability_Guideline_WHO.pdf)
- 1247 35. Fu Y, Kao WJ. Drug release kinetics and transport mechanisms of non-degradable and degradable polymeric delivery systems. *Expert Opin Drug  
1248 Deliv*. 2010;7: 429–444. doi:10.1517/17425241003602259
- 1249 36. Gaitano GG, Brown W, Tardajos G. Inclusion Complexes between Cyclodextrins and Triblock Copolymers in Aqueous Solution: A Dynamic and Static  
1250 Light-Scattering Study. *J Phys Chem B*. 1997;101: 710–719. doi:10.1021/jp961996w
- 1251 37. Chiappetta DA, Sosnik A. Poly(ethylene oxide)-poly(propylene oxide) block copolymer micelles as drug delivery agents: Improved hydrosolubility,

- 1252 stability and bioavailability of drugs. *Eur J Pharm Biopharm.* 2007;66: 303–317. doi:10.1016/j.ejpb.2007.03.022
- 1253 38. Heenan, R K; King, S.M., Osborn, R., Stanley HB. COLETTE Users Guide, Rutherford Applet Laboratory Report. Rutherford Applet Lab Rep. 1989;  
1254 89–128.
- 1255 39. King, S.M., Heenan RK. Using COLETTE. Rutherford Applet Lab Rep. 1995;95.
- 1256 40. SasView [Internet]. [cited 23 Nov 2014]. Available: <http://www.sasview.org/>
- 1257 41. Warren PB. Dissipative particle dynamics. *Curr Opin Colloid Interface Sci.* 1998;3: 620–624. doi:10.1016/S1359-0294(98)80089-7
- 1258 42. Chen S, Guo C, Hu G-H, Liu H-Z, Liang X-F, Wang J, et al. Dissipative particle dynamics simulation of gold nanoparticles stabilization by PEO–PPO–PEO  
1259 block copolymer micelles. *Colloid Polym Sci.* 2007;285: 1543–1552. doi:10.1007/s00396-007-1721-x
- 1260 43. Neun BW, Dobrovolskaia MA. Method for analysis of nanoparticle hemolytic properties in vitro. *Methods Mol Biol.* 2011;697: 215–24.  
1261 doi:10.1007/978-1-60327-198-1\_23
- 1262 44. Persaud SJ, Roderigo-Milne HM, Squires PE, Sugden D, Wheeler-Jones CPD, Marsh PJ, et al. A key role for beta-cell cytosolic phospholipase A(2) in  
1263 the maintenance of insulin stores but not in the initiation of insulin secretion. *Diabetes.* 2002;51: 98–104. Available:  
1264 <http://www.ncbi.nlm.nih.gov/pubmed/11756328>
- 1265 45. Jones PM, Salmon DM, Howell SL. Protein phosphorylation in electrically permeabilized islets of Langerhans. Effects of Ca<sup>2+</sup>, cyclic AMP, a phorbol  
1266 ester and noradrenaline. *Biochem J.* 1988;254: 397–403. Available: <http://www.ncbi.nlm.nih.gov/pubmed/2845950>
- 1267 46. Persaud, S.J., Al-Majed, H., Raman, A. JPM. Gymnema sylvestre stimulates insulin release in vitro by increased membrane permeability. *J Endocrinol.*  
1268 1999;163: 207–212. doi:10.1677/joe.0.1630207
- 1269 47. Thomas née Williams SA, Segal MB. Identification of a saturable uptake system for deoxyribonucleosides at the blood-brain and blood-cerebrospinal  
1270 fluid barriers. *Brain Res.* 1996;741: 230–239. doi:10.1016/S0006-8993(96)00930-4
- 1271 48. Williams SA, Abbruscato TJ, Hruby VJ, Davis TP. Passage of a delta-opioid receptor selective enkephalin, [D-penicillamine<sub>2</sub>,5] enkephalin, across the  
1272 blood-brain and the blood-cerebrospinal fluid barriers. *J Neurochem.* 1996;66: 1289–99. Available: <http://www.ncbi.nlm.nih.gov/pubmed/8769896>
- 1273 49. Sanderson L, Khan A, Thomas S. Distribution of suramin, an antitrypanosomal drug, across the blood-brain and blood-cerebrospinal fluid interfaces  
1274 in wild-type and P-glycoprotein transporter-deficient mice. *Antimicrob Agents Chemother.* 2007;51: 3136–3146.
- 1275 50. Thomas née Williams SA, Segal MB. Identification of a saturable uptake system for deoxyribonucleosides at the blood-brain and blood-cerebrospinal

- 1276 fluid barriers. *Brain Res.* 1996;741: 230–239. doi:10.1016/S0006-8993(96)00930-4
- 1277 51. Triguero D, Buciak J, Pardridge WM. Capillary depletion method for quantification of blood-brain barrier transport of circulating peptides and plasma  
1278 proteins. *J Neurochem.* 1990;54: 1882–8.
- 1279 52. Ráz B, Iten M, Grether-Bühler Y, Kaminsky R, Brun R. The Alamar Blue assay to determine drug sensitivity of African trypanosomes (*T.b. rhodesiense*  
1280 and *T.b. gambiense*) in vitro. *Acta Trop.* 1997;68: 139–47. Available: <http://www.ncbi.nlm.nih.gov/pubmed/9386789>
- 1281 53. Miézan TW, Bronner U, Doua F, Cattand P, Rombo L. Long-term exposure of *Trypanosoma brucei gambiense* to pentamidine in vitro. *Trans R Soc*  
1282 *Trop Med Hyg.* 88: 332–3. Available: <http://www.ncbi.nlm.nih.gov/pubmed/7974681>
- 1283 54. Wood DH, Hall JE, Rose BG, Tidwell RR. 1,5-Bis(4-amidinophenoxy)pentane (pentamidine) is a potent inhibitor of [125I]idazoxan binding to imidazoline I2  
1284 binding sites. *Eur J Pharmacol.* 1998;353: 97–103. doi:10.1016/S0014-2999(98)00386-0
- 1285 55. De Boer T, Nalos L, Stary A, Kok B, Houtman M, Antoons G, et al. The anti-protozoal drug pentamidine blocks KIR2.x-mediated inward rectifier  
1286 current by entering the cytoplasmic pore region of the channel. *Br J Pharmacol.* 2010;159: 1532–1541. doi:10.1111/j.1476-5381.2010.00658.x
- 1287 56. Nalos L, de Boer TP, Houtman MJC, Rook MB, Vos MA, van der Heyden MAG. Inhibition of lysosomal degradation rescues pentamidine-mediated  
1288 decreases of K(IR)2.1 ion channel expression but not that of K(v)11.1. *Eur J Pharmacol.* 2011;652: 96–103. doi:10.1016/j.ejphar.2010.10.093
- 1289 57. Williams K, Dattilo M, Sabado TN, Kashiwagi K, Igarashi K. Pharmacology of delta2 glutamate receptors: effects of pentamidine and protons. *J*  
1290 *Pharmacol Exp Ther.* 2003;305: 740–8. doi:10.1124/jpet.102.045799
- 1291 58. Cox D, Motoyama Y, Seki J, Aoki T, Dohi M YK. Pentamidine: a non-peptide GPIIb/IIIa antagonist--in vitro studies on platelets from humans and other  
1292 species. *Thromb Haemost.* 1992;68: 731–736.
- 1293 59. Reynolds IJ, Aizenman E. Pentamidine is an N-methyl-D-aspartate receptor antagonist and is neuroprotective in vitro. *J Neurosci.* 1992;12: 970–5.  
1294 Available: <http://www.ncbi.nlm.nih.gov/pubmed/1532027>
- 1295 60. Pathak MK, Dhawan D, Lindner DJ, Borden EC, Farver C, Yi T. Pentamidine is an inhibitor of PRL phosphatases with anticancer activity. *Mol Cancer*  
1296 *Ther.* 2002;1: 1255–64. Available: <http://www.ncbi.nlm.nih.gov/pubmed/12516958>
- 1297 61. Kitamura Y, Arima T, Imaizumi R, Sato T, Nomura Y. Inhibition of constitutive nitric oxide synthase in the brain by pentamidine, a calmodulin  
1298 antagonist. *Eur J Pharmacol.* 1995;289: 299–304. Available: <http://www.ncbi.nlm.nih.gov/pubmed/7542607>
- 1299 62. Chen X, Qiu L, Li M, D??rrnagel S, Orser BA, Xiong ZG, et al. Diarylamidines: High potency inhibitors of acid-sensing ion channels.  
1300 *Neuropharmacology.* 2010;58: 1045–1053. doi:10.1016/j.neuropharm.2010.01.011

- 1301 63. Perilo CS, Pereira MT, Santoro MM, Nagem RAP. Structural binding evidence of the trypanocidal drugs berenil and pentacarinate active principles to  
1302 a serine protease model. *Int J Biol Macromol.* 2010;46: 502–11. doi:10.1016/j.jbiomac.2010.03.006
- 1303 64. Cimecioglu AL, Weiss RA. Aromatic Polyamides of 3,8-Diamino-6-phenylphenanthridine and Their Molecular Complexes with Sulfonated Polystyrene  
1304 Ionomers. *Macromolecules.* 1995;28: 6343–6346. doi:10.1021/ma00122a047
- 1305 65. Mortensen K, Brown W. Poly(ethylene oxide)-poly(propylene oxide)-poly(ethylene oxide) triblock copolymers in aqueous solution. The influence of  
1306 relative block size. *Macromolecules.* 1993;26: 4128–4135. doi:10.1021/ma00068a010
- 1307 66. Hammouda B. SANS from Pluronic P85 in d-water. *Eur Polym J.* 2010;46: 2275–2281. doi:10.1016/j.eurpolymj.2010.10.012
- 1308 67. Valero M, Castiglione F, Mele A, da Silva MA, Grillo I, González-Gaitano G, et al. Competitive and Synergistic Interactions between Polymer Micelles,  
1309 Drugs, and Cyclodextrins: The Importance of Drug Solubilization Locus. *Langmuir.* 2016;32: 13174–13186. doi:10.1021/acs.langmuir.6b03367
- 1310 68. Puig-Rigall J, Obregon-Gomez I, Monreal-Pérez P, Radulescu A, Blanco-Prieto MJ, Dreiss CA, et al. Phase behaviour, micellar structure and linear  
1311 rheology of tetrablock copolymer Tetronic 908. *J Colloid Interface Sci.* 2018;524: 42–51. doi:10.1016/j.jcis.2018.03.096
- 1312 69. Wanka G, Hoffmann H, Ulbricht W. Phase Diagrams and Aggregation Behavior of Poly(oxyethylene)-Poly(oxypropylene)-Poly(oxyethylene) Triblock  
1313 Copolymers in Aqueous Solutions. *Macromolecules.* 1994;27: 4145–4159. doi:10.1021/ma00093a016
- 1314 70. Alexandridis P, Alan Hatton T. Poly(ethylene oxide)-poly(propylene oxide)-poly(ethylene oxide) block copolymer surfactants in aqueous solutions  
1315 and at interfaces: thermodynamics, structure, dynamics, and modeling. *Colloids Surfaces A Physicochem Eng Asp.* 1995;96: 1–46. doi:10.1016/0927-  
1316 7757(94)03028-X
- 1317 71. Alexandridis P, Holzwarth JF, Hatton TA. Micellization of Poly(ethylene oxide)-Poly(propylene oxide)-Poly(ethylene oxide) Triblock Copolymers in  
1318 Aqueous Solutions: Thermodynamics of Copolymer Association. *Macromolecules.* 1994;27: 2414–2425. doi:10.1021/ma00087a009
- 1319 72. Alexandridis P, Athanassiou V, Fukuda S, Hatton TA. Surface Activity of Poly(ethylene oxide)-block-Poly(propylene oxide)-block-Poly(ethylene oxide)  
1320 Copolymers. *Langmuir.* 1994;10: 2604–2612. doi:10.1021/la00020a019
- 1321 73. Lopes JR, Loh W. Investigation of Self-Assembly and Micelle Polarity for a Wide Range of Ethylene Oxide–Propylene Oxide–Ethylene Oxide Block  
1322 Copolymers in Water. *Langmuir.* 1998;14: 750–756. doi:10.1021/la9709655
- 1323 74. Booth C, Attwood D. Effects of block architecture and composition on the association properties of poly(oxyalkylene) copolymers in aqueous  
1324 solution. *Macromol Rapid Commun.* 2000;21: 501–527. doi:10.1002/1521-3927(20000601)21:9<501::AID-MARC501>3.0.CO;2-R
- 1325 75. Pepić I, Lovrić J, Hafner A, Filipović-Grčić J. Powder form and stability of Pluronic mixed micelle dispersions for drug delivery applications. *Drug Dev*

- 1326 Ind Pharm. 2014;40: 944–951. doi:10.3109/03639045.2013.791831
- 1327 76. Wanka G, Hoffmann H, Ulbricht W. The aggregation behavior of poly-(oxyethylene)-poly-(oxypropylene)-poly-(oxyethylene)-block-copolymers in  
1328 aqueous solution. Colloid Polym Sci. 1990;268: 101–117. doi:10.1007/BF01513189
- 1329 77. Kositz MJ, Bohne C, Alexandridis P, Hatton TA, Holzwarth JF. Micellization Dynamics and Impurity Solubilization of the Block-Copolymer L64 in an  
1330 Aqueous Solution. Langmuir. 1999;15: 322–325. doi:10.1021/la9812368
- 1331 78. Loh W. Block and Copolymer Micelles. In: Somasundaram, P., Dekker M, editor. Encyclopedia of Surface and Colloid Science. 2006. pp. 1014–1025.
- 1332 79. Prasad KN, Luong TT, FlorenceJoelle Paris AT, Vaution C, Seiller M, Puisieux F. Surface activity and association of ABA polyoxyethylene—  
1333 polyoxypropylene block copolymers in aqueous solution. J Colloid Interface Sci. 1979;69: 225–232. doi:10.1016/0021-9797(79)90151-6
- 1334 80. Sahoo L, Sarangi J, Misra PK. Organization of Amphiphiles, Part 1: Evidence in Favor of Pre-micellar Aggregates through Fluorescence Spectroscopy.  
1335 Bull Chem Soc Jpn. 2002;75: 859–865. doi:10.1246/bcsj.75.859
- 1336 81. Kabanov A V., Nazarova IR, Astafieva I V., Batrakova E V., Alakhov VY, Yaroslavov AA, et al. Micelle Formation and Solubilization of Fluorescent  
1337 Probes in Poly(oxyethylene-b-oxypropylene-b-oxyethylene) Solutions. Macromolecules. American Chemical Society; 1995;28: 2303–2314.  
1338 doi:10.1021/ma00111a026
- 1339 82. Lowe KC, Furmidge BA, Thomas S. Haemolytic Properties of Pluronic Surfactants and Effects of Purification. Artif Cells, Blood Substitutes, Biotechnol.  
1340 1995;23: 135–139. doi:10.3109/10731199509117673
- 1341 83. Magnusson G, Olsson T, Nyberg JA. Toxicity of Pluronic F-68. Toxicol Lett. 1986;30: 203–7. Available: <http://www.ncbi.nlm.nih.gov/pubmed/3705104>
- 1342 84. Morgan N, Chan S. Imidazoline Binding Sites in the Endocrine Pancreas: Can They Fulfil Their Potential as Targets for the Development of New Insulin  
1343 Secretagogues? Curr Pharm Des. 2001;7: 1413–1431. doi:10.2174/1381612013397366
- 1344 85. Morgan NG. Imidazoline receptors: new targets for antihyperglycaemic drugs. Expert Opin Investig Drugs. 1999;8: 575–84.  
1345 doi:10.1517/13543784.8.5.575
- 1346 86. Gao H, Mourtada M, Morgan NG. Effects of the imidazoline binding site ligands, idazoxan and efaroxan, on the viability of insulin-secreting BRIN-  
1347 BD11 cells. JOP. 2003;4: 117–24. Available: <http://www.ncbi.nlm.nih.gov/pubmed/12743417>
- 1348 87. Yi X, Yuan D, Farr SA, Banks WA, Poon C-D, Kabanov A V. Pluronic modified leptin with increased systemic circulation, brain uptake and efficacy for  
1349 treatment of obesity. J Control Release. 2014;191: 34–46. doi:10.1016/j.jconrel.2014.05.044

- 1350 88. Batrakova E V, Miller DW, Li S, Alakhov VY, Kabanov A V, Elmquist WF. Pluronic P85 enhances the delivery of digoxin to the brain: in vitro and in vivo  
1351 studies. *J Pharmacol Exp Ther*. 2001;296: 551–7. Available: <http://www.ncbi.nlm.nih.gov/pubmed/11160643>
- 1352 89. Saeed M, Hartmann A, Bing RJ. Inhibition of vasoactive agents by perfluorochemical emulsion. *Life Sci*. 1987;40: 1971–9. Available:  
1353 <http://www.ncbi.nlm.nih.gov/pubmed/2437426>
- 1354 90. Watanabe M, Okada T. Lysophosphatidylcholine-induced myocardial damage is inhibited by pretreatment with poloxamer 188 in isolated rat heart.  
1355 *Mol Cell Biochem*. 2003;248: 209–15. Available: <http://www.ncbi.nlm.nih.gov/pubmed/12870676>
- 1356 91. Bronner U, Doua F, Ericsson Ö, Gustafsson LL, Miézan T, Rais M, et al. Pentamidine concentrations in plasma, whole blood and cerebrospinal fluid  
1357 during treatment of *Trypanosoma gambiense* infection in Côte d’Ivoire. *Trans R Soc Trop Med Hyg*. 1991;85: 608–611. doi:10.1016/0035-  
1358 9203(91)90364-5
- 1359
- 1360

1361 **Supporting information captions**

1362 **Fig S1. Pentamidine is returned to the blood from the capillary endothelial cell by P-gp and MRP. Pluronic®P85 inhibits-mediated efflux (e.g. P-gp and**  
1363 **MRP transport) by two mechanisms; the first through membrane fluidisation and the second through transient ATP depletion.** These effects are believed  
1364 to be mediated by unimers (single polymer chains) [21][19]. Inhibition of efflux should facilitate the accumulation of pentamidine in the human cerebral  
1365 capillary endothelium and the murine choroid plexus epithelium, leading to higher concentrations of pentamidine.

1366 **Fig S2. Pyrene fluorescence intensity dependence on pluronic concentration for F68, P85 and P105.** The CMC was determined using 18 different  
1367 concentrations (range 0.0001 to 1 w/v%) of pure P85, P105 and F68. The value at each concentration is the mean of two samples, each prepared from a  
1368 separate preparation of the stock solution. As expected the curves show two inflection points. The first was taken as the CMC.

1369  
1370 **Fig S3. Typical partition data for PTI fluorescence as a function of F68 and P105 concentration.**

1371

1372 **Fig S4. Drug release from dialysis cells measured over time. The experiments were conducted in water at 37°C for concentrations as close as possible to**  
1373 ***in vitro* conditions, within experimental limitations, namely, 1% w/v of Pluronics and 10mM PTI.** No significant differences between the Pluronics were  
1374 observed and drug release is diffusion controlled (Fickian diffusion) under the experimental conditions. Pluronics micelles are not a barrier to drug release.

1375

1376 **Fig S5: SANS Pluronic data at 37°C. A) P85 5% B) F68 5% C) P85 5% / PTI 1 % D) F68 5% / PTI 1 % E) P85 5% / PTI 3 % F) F68 5% / PTI 3 %.**



1377

1378 **Fig S6. The average number of Pluronic molecules found in a micelle ( $N_{agg}$ ) and the number of micelles in our system (after they have**  
1379 **equilibrated) ( $N_{mic}$ ) as a function of the concentration of the F68 Pluronic in a system that contains F68 and 0.01 w/v% of L61 Pluronic.** In  
1380 the both plots, the black curve represents the results when considering both the L61 and F68 polymers in the mixture, and the blue dashed  
1381 curve represents the data from the pure F68 simulated systems. In the top curve, the red curve represents the number of F68 in a micelle  
1382 which contains both F68 and L61, and the green curve represents the number of L61 in a micelle. The results show that as we increase the  
1383 concentration of F68, and therefore make the system more and more like the pure F68 system, the number of polymer molecules in a micelle and the  
1384 number of micelles converge to that observed in the pure F68 system, as expected. Interestingly, it seems that from our simulations that L61 causes the  
1385 aggregation of F68 to become slightly enhanced as the number of F68 in the average micelle is always larger than that found in the pure F68 micelles, which  
1386 naturally results in their being fewer micelles.

1387 **Fig S7. Apical to basolateral permeability of [ $^{14}$ C]sucrose in the presence of P85, P105, and F68 concentrations measured over 60 minutes.** Significant  
1388 differences compared to control (no pluronic) was observed in the presence of P85 and P105 (\*\* $p < 0.001$ , \*\* $p < 0.01$ ). All data are expressed as mean  $\pm$   
1389 S.E.M, n= 3 wells. Data were analysed using one-way ANOVA with SigmaPlot 13.0.

1390

1391 **Fig S8. Effects of exposure of MIN6  $\beta$ -cells to 0 (control), 1 or 100  $\mu$ M pentamidine for 3 and 24 hours. Trypan blue uptake.** Blue staining demonstrates  
1392 cells of compromised viability, highlighting the toxicity of 100  $\mu$ M pentamidine to these cells after 3 hours exposure.

1393

1394 **Fig S9. Effects of exposure of MIN6  $\beta$ -cells to 0, 1, 10 or 100  $\mu$ M pentamidine and 0, 0.01, 0.025, 0.1 or 0.5% w/v% F68 for 24 hours. Trypan blue uptake.**  
1395 Blue staining demonstrates cells of compromised viability, highlighting the toxicity of 100  $\mu$ M pentamidine and 0.5% F68 to these cells.

1396

1397 **Table S1. Single point CNS screening of pentamidine at a concentration of  $1.0E^{-5}$  M (PE study no. 13-9625).** Values are expressed as the percent inhibition  
1398 of specific binding and represent the average of replicate tubes. Bolder values represent inhibition of 50% or greater.

1399 **Table S2. Inhibition of hKir2.1 potassium channel activity with pentamidine isethionate.**

1400 **Evaluated by the QPatch HT an automatic parallel patch clamp system.** The duration of exposure to each test concentration was 3 minutes.

1401

1402 **Table S3. A visual evaluation of the phase separation of Pluronics dispersions in pure water. Transparent is fully transparent. Opaque**  
1403 **completely blocks light.** Slight indicates for slightly translucent (faintly white tint in the solution), and medium indicates obvious translucence.

1404 **Table S4. A visual evaluation of the phase separation of pluronics dispersions in saline. Transparent is fully transparent. Opaque completely blocks light.**  
1405 Slight indicates for slightly translucent (faintly white tint in the solution), and medium indicates obvious translucence

1406 **Table S5. The effect of P85, F68 and P105 on the apparent permeability of pentamidine isethionate across MDR1-MDCK cell monolayers in the**  
1407 **basolateral to apical direction.** The apical to basolateral movement of pentamidine isethionate was below the limits of detection. The percentage  
1408 recovery of pentamidine isethionate is also shown. Lucifer yellow permeation was below  $0.5 \times 10^{-6}$  cm/s in all experiments confirming the integrity of the  
1409 monolayer. Transcellular marker (propranolol) and Pgp and BCRP substrate (prazosin) apparent permeability values are also shown.

1410 **Table S6. The effect of Pluronic P85 on the accumulation of [<sup>3</sup>H(G)]pentamidine (15.7 nM) into brain tissues after 10 minutes of *in situ* perfusion.** All  
1411 values have been corrected for vascular space by subtraction of the  $R_{\text{TISSUE}}\%$  for [<sup>14</sup>C(U)]sucrose from the  $R_{\text{TISSUE}}\%$  for [<sup>3</sup>H(G)]pentamidine. All values mean  $\pm$   
1412 SEM.

1413 **Table S7. The effect of Pluronic P105 on the accumulation of [<sup>3</sup>H(G)]pentamidine (15.7 nM) into brain parenchyma after 10 minutes of *in situ***  
1414 **perfusion.** All values have been corrected for vascular space by subtraction of the  $R_{\text{TISSUE}}\%$  for [<sup>14</sup>C(U)] sucrose from the  $R_{\text{TISSUE}}\%$  for [<sup>3</sup>H(G)]pentamidine.

1415 **Table S8. Accumulation of <sup>3</sup>H-pentamidine (15.7 nM) after 10 minutes perfusion with or without pluronic F68 (not corrected for vascular space; Control A**  
1416 **and 0.01% and 0.1% F68 experiments were carried out using MP Biomedicals dextran.** Control B and 0.5% F68 experiments were carried out  
1417 using VWR dextran).

1418 **Table S9. Accumulation of [<sup>14</sup>C]sucrose after 10 minutes perfusion with or without Pluronic F68; Control A and 0.01% and 0.1% F68 experiments were**  
1419 **carried out using MP Biomedicals dextran.** Control B and 0.5% F68 experiments were carried out using VWR dextran).

1420 **Table S10A. Accumulation of [<sup>3</sup>H]pentamidine after 30 minutes perfusion with or without pluronic F68.** (Not corrected for vascular space).

1421 **Table S10B. Accumulation of [<sup>14</sup>C]sucrose (B) after 30 minutes perfusion with or without pluronic F68. (Not corrected for vascular space).**

1422

## START

Perkin-Elmer  
CNS  
neurological  
profiling screen

Chantest ion  
channel screen

## For ~ 30 Formulations

*In silico*  
Critical Micellar Concentration (CMC)  
Hydration stability  
Encapsulation efficiency

SAR feedback loop

### Additional Formulation Studies

- SANS; Aggregate structure
- SANS/NMR/Fluo; Aggregation number
- NMR: drug/polymer interaction
- *In silico*: Aggregate structure, aggregation number, drug/polymer interaction, polymer/P-gp interaction

*Physical Properties in vitro*  
Critical Micellar Concentration (CMC)  
Formulation Stability (37° )  
Drug Release studies (dialysis)  
Drug Partitioning (Fluorescence)

*BBB penetration*  
Human BBB EC uptake *in vitro*  
Mouse choroid plexus delivery *in vivo*

*Peripheral Toxicity in vitro*

- Haemolysis assay
- Beta cell viability & Insulin secretion
- 72h exposure *cf* pentamidine alone

*Trypanocidal Activity in vitro*  
Trypanosomal killing  
72h exposure *cf* pentamidine alone

## Milestone 1 (at 12 months): Select at least 5-6 formulations for further characterisation

Human EC toxicity (MTT) *in vitro*

Formulation viscosity/stability

Mouse neuronal toxicity *in vitro*

Mouse Irwin screen *in vivo*

*Brain penetration in vivo (mouse; i.v.)*  
Plasma & terminal brain samples  
Pentamidine brain:plasma ratio

*CSF penetration in vivo (mouse; i.v.)*

- Plasma & microdialysis samples
- Pentamidine CSF:plasma ratio

All shaded boxes=CROs/Outsourced experiments

*Multiple dose studies in vivo (mouse; i.v.)*  
Plasma & terminal brain samples  
Steady state pentamidine brain:plasma ratio

## Milestone 2 (24 months): Select 1-2 formulations for efficacy and toxicity studies *in vivo*

*Efficacy against Stage 1 HAT (mouse; i.v.)*

- 1 month model
- Bioanalysis; terminal brain & plasma samples

*Efficacy against Stage 2 HAT (mouse; i.v.)*  
3 month model (in vivo imaging)  
Bioanalysis; terminal brain & plasma samples

*Peripheral Toxicity in vivo (mouse; i.v.)*  
Glucose tolerance, insulin secretion  
Pancreas/brain histopathology

## Milestone 3 (30 months): Identify 1 formulation that is effective against stage 2 HAT

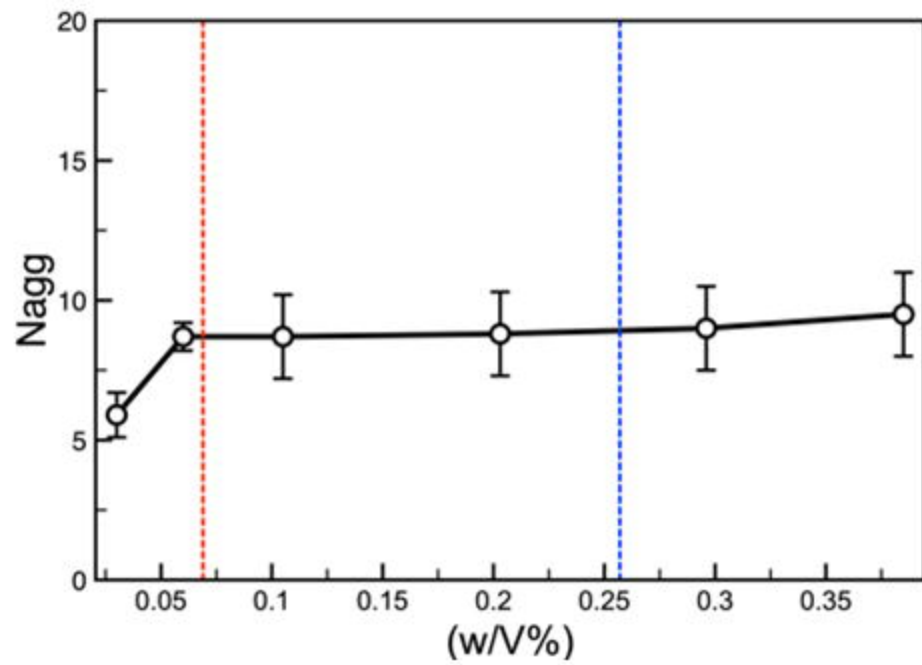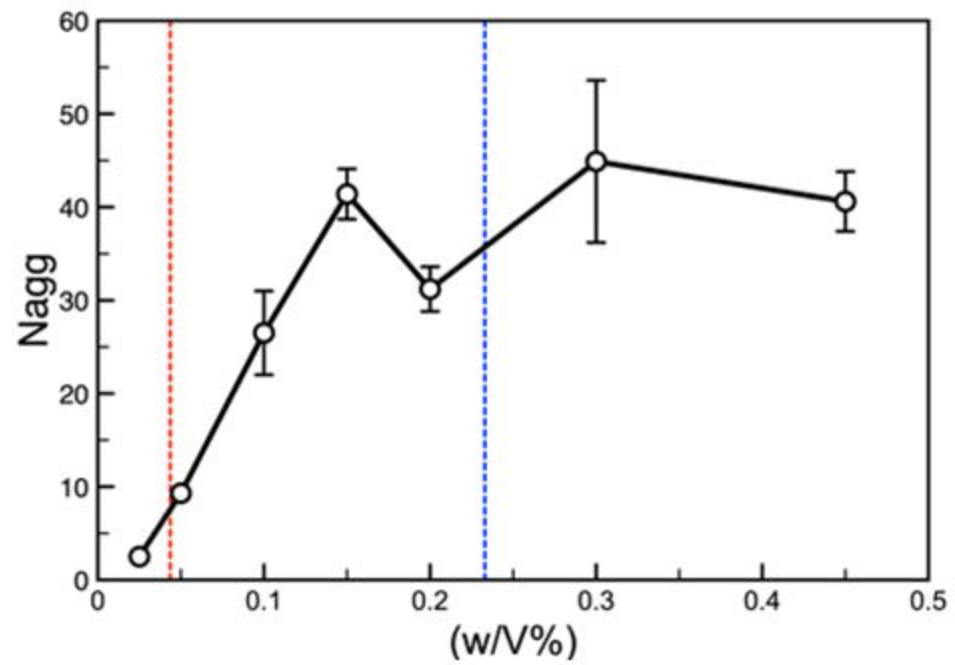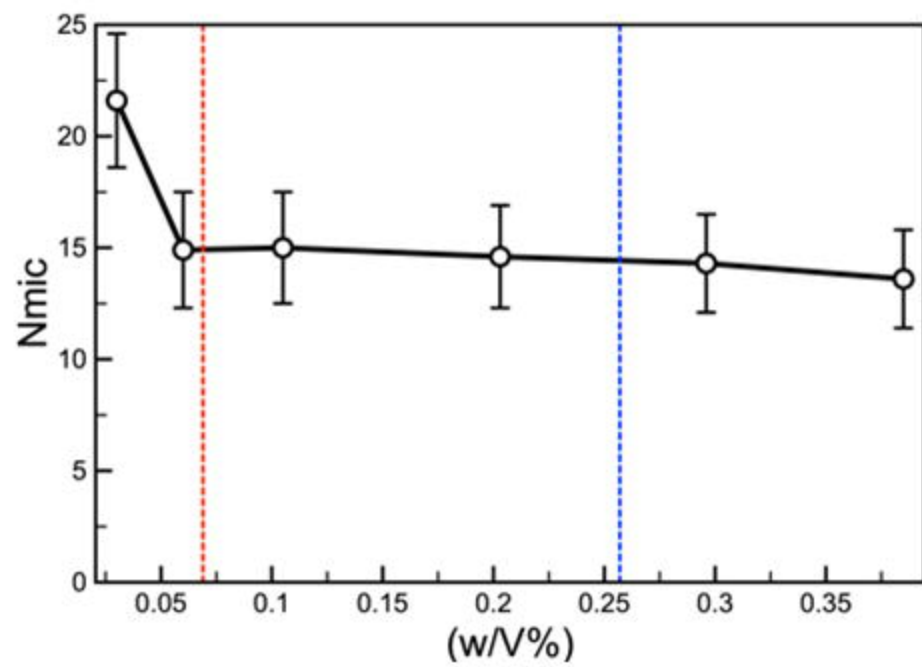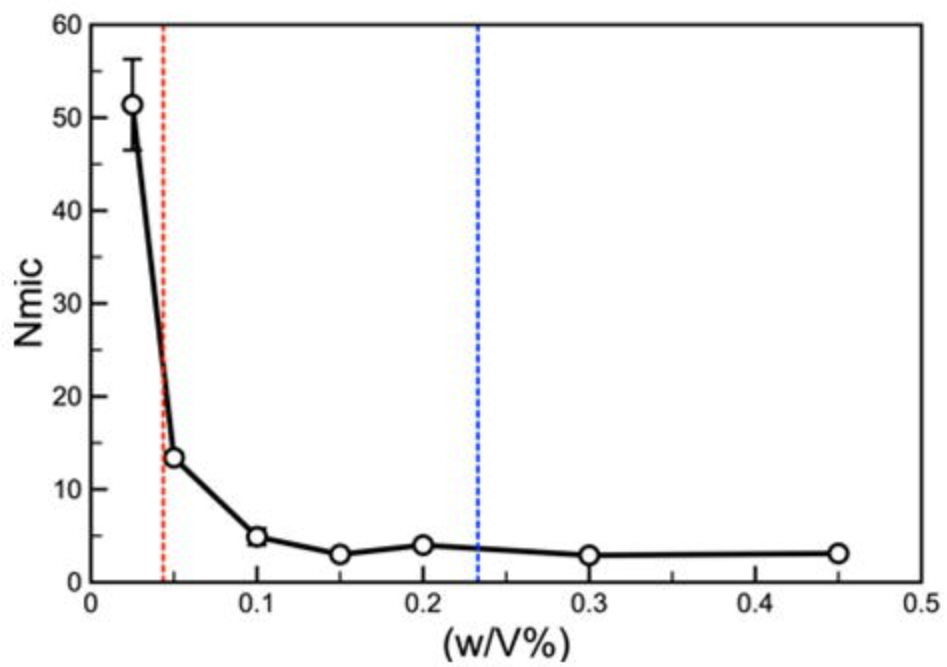

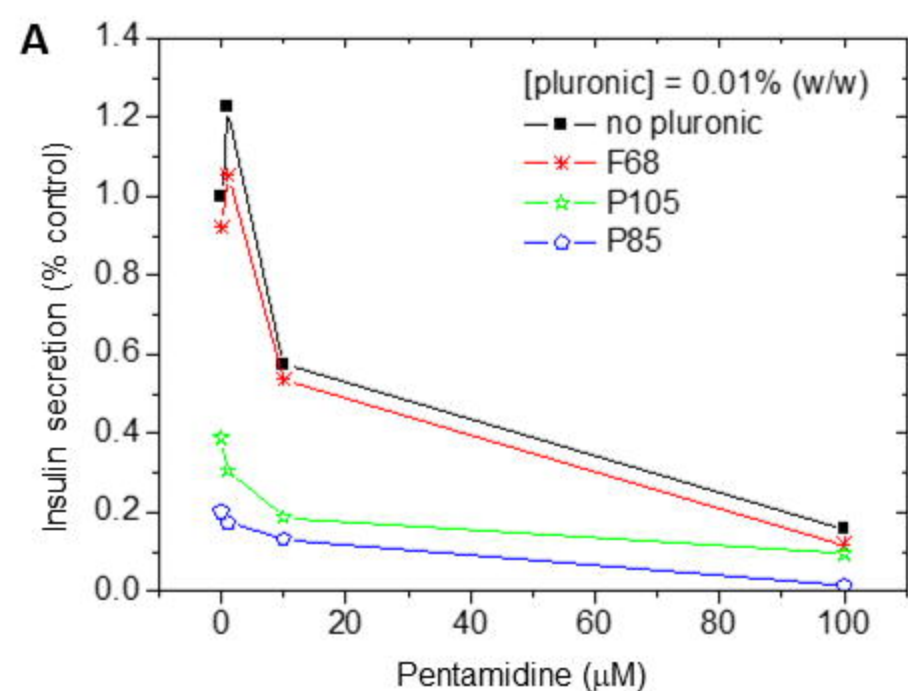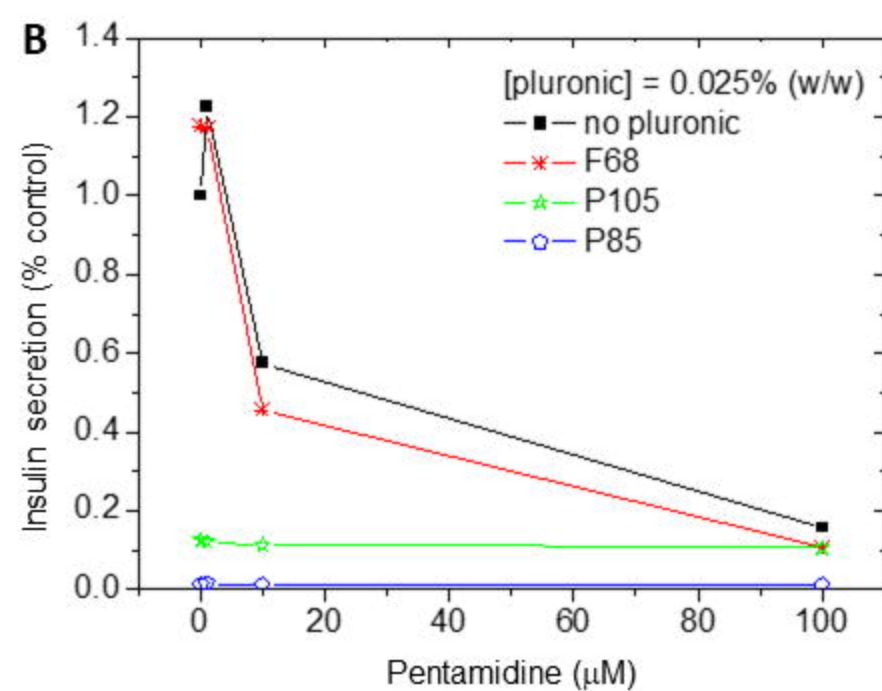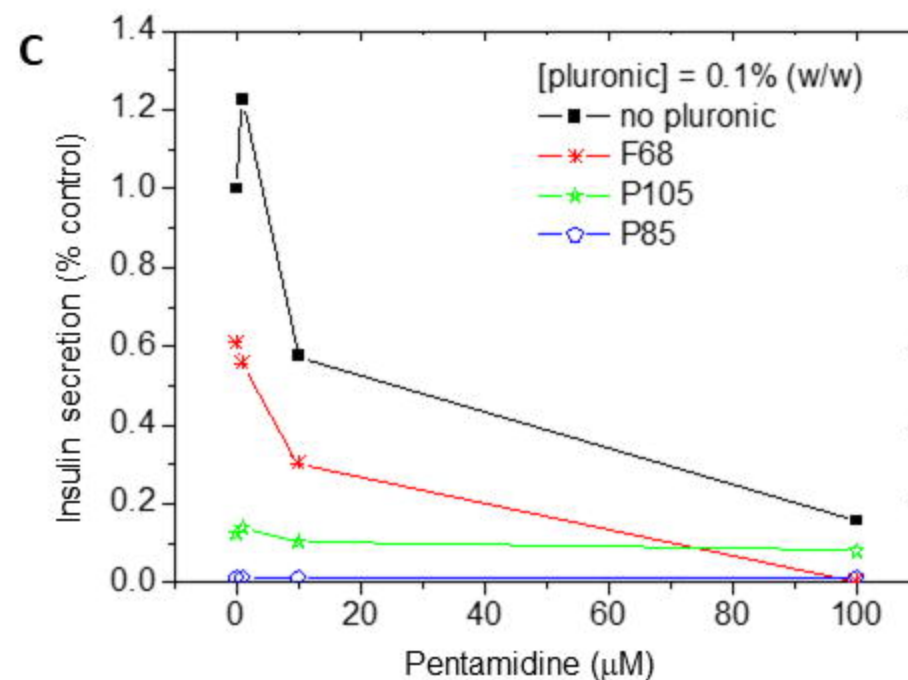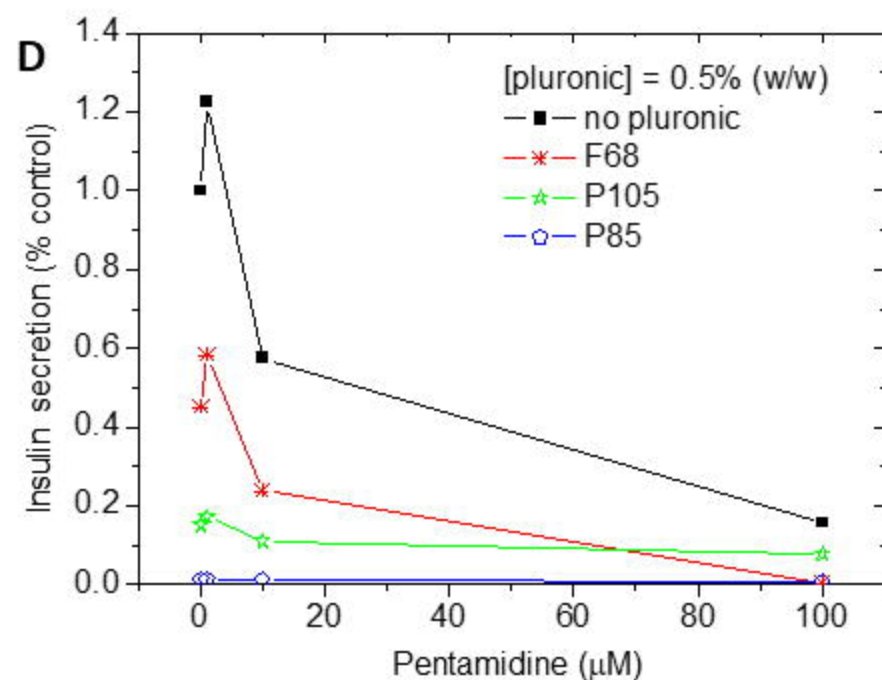



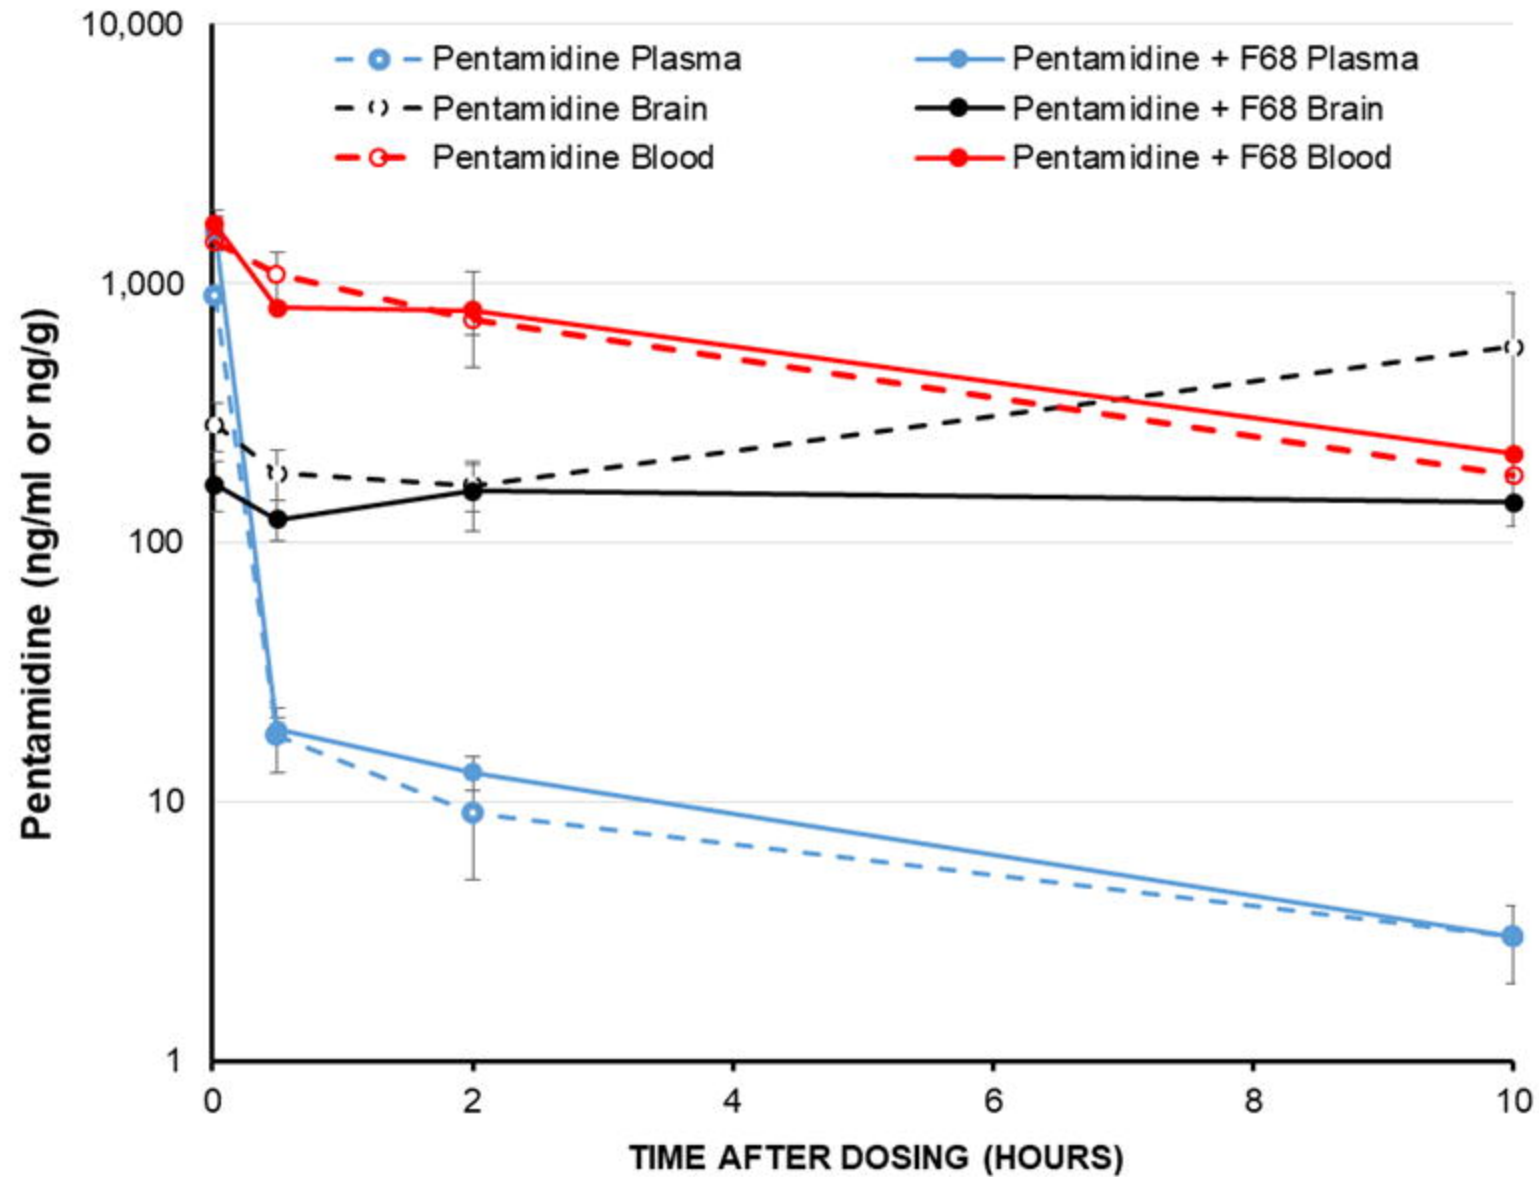

Source: https://www.biorxiv.org/content/10.1101/573329v2.full.pdf
